1        **Identification of consensus head and neck cancer-associated microbiota signatures: a**  
2                    **meta-analysis of 16S rRNA and The Cancer Microbiome Atlas datasets.**

3        Kenny Yeo <sup>1,2</sup>, Runhao Li<sup>1,3</sup>, Fangmei Wu<sup>1,3</sup>, George Bouras<sup>2</sup>, Linh T.H. Mai<sup>1,2</sup>, Eric  
4        Smith<sup>1,3</sup>, Peter-John Wormald<sup>1,2</sup>, Rowan Valentine<sup>2</sup>, Alkis James Psaltis<sup>1,2</sup>, Sarah Vreugde<sup>1,2</sup>,  
5        and Kevin Fenix<sup>1,2</sup>

6        (1) Discipline of Surgery, Adelaide Medical School, The University of Adelaide, Adelaide,  
7        SA, 5000, Australia

8        (2) Department of Surgery- Otolaryngology Head and Neck Surgery, The University of  
9        Adelaide and the Basil Hetzel Institute for Translational Health Research, Central Adelaide  
10       Local Health Network, Adelaide, SA, 5000, Australia

11       (3) Department of Haematology and Oncology, Basil Hetzel Institute for Translational Health  
12       Research and The Queen Elizabeth Hospital, Central Adelaide Local Health Network,  
13       Adelaide, SA, 5000, Australia

14

15       **Corresponding author:**

16       Kevin Fenix

17       Email: [kevin.fenix@adelaide.edu.au](mailto:kevin.fenix@adelaide.edu.au)

18       **Word count:** 6021

19

20

21

22

23

24

25

26 **Highlights:**

- 27       • The first meta-analysis of tissue microbiome in head and neck cancer containing eleven  
28       16S ribosomal RNA and The Cancer Microbiome Atlas dataset.
- 29       • Microbiome from head and neck tissues were able to distinguish tissue types (cancer,  
30       cancer-adjacent, non-cancer) using 16S rRNA sequencing and whole genome sequencing  
31       datasets.
- 32       • Specific bacterial genera correlate with different tumour microenvironment phenotypes.
- 33       • High abundance *Fusobacterium* in tumour tissue correlates with better overall survival.

34

35 **Abstract:**

36 **Objective:** Multiple reports have attempted to describe the tumour microbiota in head and  
37 neck cancer. However, these have failed to produce a consistent microbiota signature which  
38 may undermine understanding the importance of bacterial-mediated effects in head and neck  
39 cancer. The aim of this study is to consolidate these datasets and identify a consensus  
40 microbiota signature in head and neck cancer.

41 **Methods:** We analysed 11 published head and neck cancer 16S ribosomal RNA microbial  
42 datasets collected from cancer, cancer-adjacent and non-cancer tissue to generate a consensus  
43 microbiota signature. These signatures were then validated using The Cancer Microbiome  
44 Atlas database.

45 **Results:** We identified unique bacteria enrichment within tissue types and correlated it with  
46 possible functional and clinical outcomes.

47 **Conclusions:** Our meta-analysis demonstrates a consensus microbiota signature for head and  
48 neck cancer, highlighting its potential importance in this disease.

49

50 **Keywords:** Tumour Microbiota, Head and Neck Cancer, 16s rRNA Sequencing, Meta-  
51 Analysis



## 53 1. Introduction

54 Recent studies have revealed that cancers previously thought to be sterile can contain unique  
55 microbial communities. The extent of microbial infiltration varies across different cancer  
56 types, with head and neck cancers (HNSC) containing one of the highest level of intratumoral  
57 microbial infiltrates while glioblastomas having the least amount of microbes.<sup>1-3</sup> This  
58 “intratumoral microbiota” can refer to bacterial infiltrates found in the extracellular matrix or  
59 within the cellular components of the tumour such as cancer, immune and stromal cells.<sup>2</sup> It is  
60 now widely appreciated that intratumoral bacteria can have direct and indirect effects on  
61 tumours or the tumour microenvironment (TME).<sup>4-6</sup> The presence of specific intratumoral  
62 bacteria has been reported to influence multiple features of tumour biology including  
63 treatment efficacy, local immune composition and activity and promoting tumour  
64 metastasis.<sup>7-10</sup>

65  
66 Direct interaction between specific bacterial species with the tumour and the TME can induce  
67 chemoresistance, promote tumour progression, enhance therapeutic responses and modulate  
68 anti-tumour immunity through various mechanisms.<sup>11-14</sup> Bacteria can metabolise an active  
69 drug into its inactive form or induce autophagy in cancer cells which can promote  
70 chemoresistance.<sup>12-14</sup> Moreover, specific bacterial species can mount or suppress anti-tumour  
71 responses.<sup>15-17</sup> Most notably, *Fusobacterium nucleatum* colocalises with cancer and immune  
72 cells by binding to cell surface receptors such as Toll-like receptor 4 (TLR-4), T-cell  
73 immunoreceptor with Ig and ITIM domains (TIGIT) and Carcinoembryonic Antigen-Related  
74 Cell Adhesion Molecule 1 (CEACAM-1) receptors, or sugar groups (e.g. tumour expressed  
75 Galactose-N-acetylgalactosamine), which may then promote chemoresistance and suppress  
76 anti-tumour immunity<sup>13, 15, 18-22</sup>. Alternatively, *Bifidobacterium species* enhance anti-tumour  
77 immunity and efficacy of PD-1 immunotherapy responses.<sup>8, 23, 24</sup>

78

79 The release of bacterial metabolites such as short chain fatty acids (SCFA), amino acids,  
80 vitamins and bile acids can indirectly affect the tumour and the TME.<sup>25, 26</sup> Butyrate, a SCFA  
81 released by anaerobic bacteria through fermentation of carbohydrates, can decrease tumour  
82 cell growth and invasion, while increasing CD8<sup>+</sup> T cell-mediated anti-tumour responses.<sup>27-30</sup>  
83 However, butyrate has also been shown to have pro-tumorigenic effects by inducing  
84 senescence-associated inflammatory phenotypes and inhibiting natural killer cell functions.<sup>31</sup>  
85 <sup>32</sup> Bacteria-derived indole and its derivatives (i.e. indole-3-lactic acid) have been shown to  
86 suppress anti-tumour immunity by activating immunosuppressive tumour-associated  
87 macrophages in treatment-naïve pancreatic cancer, while improving chemotherapeutic and  
88 immune-checkpoint inhibitor efficacy in pancreatic cancer and melanoma.<sup>33-35</sup> Together,  
89 these studies demonstrate that the tumour microbiota can influence cancer clinical outcomes  
90 in a context-dependent manner.

91

92 There are multiple reports describing the microbiota in HNSC.<sup>36-89</sup> Most of these studies  
93 compared the microbiota diversity and bacterial relative abundance between cancer and  
94 healthy samples using 16S ribosomal RNA (rRNA) sequencing<sup>36-85, 88, 89</sup>, while two studies  
95 additionally correlated the impact of the microbiota with matched transcriptome analysis.<sup>86, 90</sup>  
96 Samples studied include tissues, swabs, and oral fluids (saliva or oral rinse) from cancer and  
97 healthy patients. Specifically for HNSC tissue microbiota analysis, samples included cancer,  
98 cancer-adjacent (approximately > 5 mm away from the tumour), contralateral, and healthy  
99 donor tissue samples.<sup>36-55, 57-60, 85-89</sup> Most bacteria identified in HNSC are oral commensal  
100 bacteria from the genera *Streptococcus*, *Rothia*, *Fusobacterium*, *Haemophilus* and  
101 *Prevotella*.<sup>36-38</sup> However, changes in microbial composition have been identified when cancer  
102 samples are compared to healthy controls. In general, there was an enrichment in

103 *Fusobacterium* within cancer tissue samples, that correlated with an inflammatory  
104 phenotype.<sup>36, 37, 47</sup> However, inconsistencies are observed for microbes such as *Streptococcus*,  
105 *Actinomyces* and *Prevotella* warranting the need to identify a consensus microbiota signature  
106 for HNSC.<sup>37, 38, 43, 54, 85</sup>

107

108 In this study, we systematically reviewed the literature and performed a meta-analysis to  
109 consolidate the currently heterogeneous HNSC-associated microbiota data. Selected 16s rRNA  
110 sequencing datasets were analysed consistently to minimise variability between different  
111 sample cohorts and adjusted for batch-effects.<sup>91</sup> These consensus HNSC-associated microbial  
112 signatures were then validated using whole genome sequencing (WGS) data from The Cancer  
113 Microbiome Atlas (TCMA).<sup>1</sup> Finally, we correlated the presence of different microbiota  
114 signatures with the HNSC tumour microenvironment and clinical outcomes.

## 115 2. Methods

116 This study was performed according to the Preferred Reporting Items for Systematic Reviews  
117 and Meta-Analyses (PRISMA) Statement.<sup>92</sup>

### 118 2.1 Search and Study Selection

119 The following criteria were used to select datasets: 1) Tissue samples, 2) Presence of  
120 metadata to distinguish sample types, 3) Illumina short-read amplicon sequencing of 16S  
121 rRNA V3 to V5 primers (Figure 1). Database search was performed on 16 August 2022 and  
122 datasets after this date were not included (Supplementary Table 1). The risk of biasness  
123 assessment was conducted using RoB 2 ( $\beta$  v9) (Supplementary Table 1).

124  
125

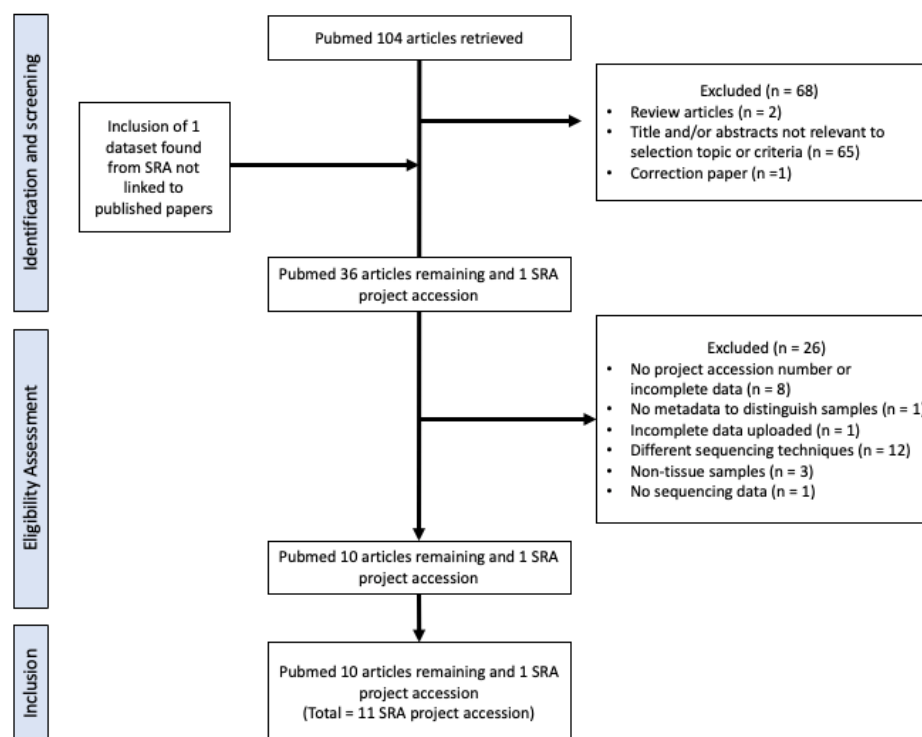

126  
127  
128

**Figure 1: Study selection flow chart.**

129

### 130 2.2 Download, pre-processing, and analysis of 16S rRNA datasets

131 Previously published raw sequences were retrieved from the National Center for  
132 Biotechnology Information (NCBI) Sequence Read Archive (SRA) using pysradb.<sup>93</sup> Samples  
133 were divided into three main groups – cancer, cancer-adjacent and non-cancer tissues. Cancer  
134 tissues are defined as tissues obtained directly from the tumour, while cancer-adjacent tissues  
135 are cancer-free regions obtained > 5mm away from cancer tissues. Non-cancer tissues are  
136 defined as tissues that were either obtained from healthy patients or contralateral tissues  
137 obtained from cancer patients. FASTQ sequences files were obtained from SRA using  
138 sratoolkit.<sup>94</sup> These sequences were processed using QIIME2 DADA2 denoise-paired and  
139 reads truncated using the same parameters (trim\_left\_f = 30, trim\_left\_r = 30, trunc\_q = 15).  
140 Sequences from different studies were merged before bacterial Operational Taxonomic Units  
141 (OTU) classification using QIIME2 and SILVA reference database (version silva-138-99-nb-  
142 classifier).<sup>95</sup>

143

144 Raw microbial reads were filtered, central log-ratio (CLR) transformed and batch-adjusted  
145 using Phyloseq and MixOmics as described previously.<sup>96-98</sup> Microbiome datasets are  
146 inherently compositional, hence, CLR transformation addresses generates scale-invariant  
147 values which allows datasets to remain unaffected by variations in library sizes among  
148 samples.<sup>99</sup> Briefly, low abundance of OTUs were filtered through proportional counts of all  
149 samples (< 1%) and minimum counts per sample (< 10). Bacterial OTUs were agglomerated  
150 at the genus level before transforming into CLR for their compositional nature.<sup>96, 98</sup> The CLR-  
151 abundance was used for subsequent statistical and discriminant analysis. A total of 903 SRA  
152 samples from 11 projects were downloaded (Table 1).

153

154

155

156



157

158 **Table 1: Study accession and sample size post-filtering**

159

160

| Accession number | Sample size |                 |            | Primers |
|------------------|-------------|-----------------|------------|---------|
|                  | Cancer      | Cancer-adjacent | Non-cancer |         |
| PRJNA412445      | 16          | 0               | 0          | V4 -V5  |
| PRJNA555458      | 0           | 0               | 4          | V3 -V4  |
| PRJNA596113      | 102         | 53              | 0          | V3 -V4  |
| PRJNA597251      | 19          | 20              | 0          | V3 -V4  |
| PRJNA666746      | 50          | 50              | 0          | V3 -V4  |
| PRJNA666891      | 7           | 0               | 10         | V4      |
| PRJNA685226      | 13          | 13              | 0          | V3 -V4  |
| PRJNA699728      | 37          | 0               | 201        | V4      |
| PRJNA803155      | 40          | 0               | 0          | V4 -V5  |
| PRJNA822685      | 75          | 79              | 0          | V3 -V4  |
| PRJNA866676      | 37          | 36              | 41         | V3 -V4  |

166

### 167 2.3 Discriminant analysis of 16S rRNA dataset

169 To discriminate the microbial signature between sample types, we employed both  
170 multivariate and univariate discriminant analysis. For  $\beta$ -diversity analysis, CLR-abundance of  
171 all genera were ordinated using Euclidean distance and plotted on a principal component  
172 analysis (PCA) using mixOmics R package.  $\beta$ -diversity for each sample were calculated as  
173 distance to centroid for each tissue groups using betadisper (vegan v2.6-4). Group and  
174 pairwise permutest (vegan v2.6-4, permutations = 9999) was performed to determine if  
175 dispersions differed between sample types, while group and pairwise permutational  
176 multivariate analysis of variance (PERMANOVA) was performed using adonis2 (vegan v2.6-  
177 4, method = "euclidean", permutation = 9999) and pairwise.adonis2 (pairwiseAdonis, method  
178 = "euclidean", permutation = 9999) to determine statistical differences in  $\beta$ -diversity between  
179 groups. Other statistical test such as Analysis of similarities (ANOSIM) (vegan v2.6-4,  
180 distance = "euclidean", permutation = 9999) and Fifty-fifty multivariate analysis of variance  
181 (FFMANOVA) (nSim = 9999) were also applied as supplementary to distinguish between  
182 sample types.<sup>100, 101</sup>

183 Multivariate sparse partial linear discriminant analysis (sPLS-DA) was applied on batch-  
184 adjusted dataset to identify discriminating genera within each sample type.<sup>96</sup> The Area Under  
185 Curve (AUC) of the Receiver Operating Characteristics (ROC) curve was calculated using  
186 mixOmics in Rstudio.<sup>96, 98</sup> The AUC value served as a quantification of the discriminatory  
187 potential between sample types. A higher AUC value, closer to 1, signified a test approaching  
188 perfection in its ability to distinguish between the samples. Heatmap of all representative  
189 bacteria in each sPLS-DA was presented with sample type clustered according to Euclidean  
190 distance and Ward's linkage.

191

192 Univariate Kruskal-Wallis test with Bonferroni multiple comparisons test was also performed  
193 to determine microbial genera differences between sample types using microbiomeMarker in  
194 Rstudio v3.3.0, followed by a post-hoc Wilcoxon test (Mann-Whitney test) with Bonferroni-  
195 Dunn multiple comparison test to determine differences between groups (cancer– cancer-  
196 adjacent, cancer – non-cancer, non-cancer – cancer-adjacent). Additionally, Wilcoxon  
197 matched-pairs signed rank test with Bonferroni-Dunn multiple comparison test was also  
198 performed on paired cancer and cancer-adjacent samples.

199

#### 200 **2.4 Functional profiling analysis of 16S rRNA datasets in different sample types**

201 To predict the microbial functions of genera detected from 16S rRNA sequencing between  
202 each tissue sample type, Phylogenetic Investigation of Communities by Reconstruction of  
203 Unobserved States 2 (PICRUST2) from QIIME2 was applied on raw 16S rRNA reads using  
204 MetaCyc database.<sup>102, 103</sup> Functional abundance was processed and analysed similarly as  
205 described for raw microbial reads. Univariate Kruskal-Wallis test and post-hoc Wilcoxon test  
206 was performed as previously described to compare differences between groups.

207

## 208 **2.5 Reanalysis of tissue microbiome data from TCMA**

209 Decontaminated microbial read count derived from The Cancer Genome Atlas (TCGA)  
210 HNSC whole genome sequences were obtained from TCMA repository.<sup>1</sup> Data from a total of  
211 177 cancer (TCGA annotation: primary tumour) and 22 cancer-adjacent (TCGA annotation:  
212 solid tumour normal) tissues were obtained from TCMA repository (n = 22 paired cancer and  
213 cancer-adjacent samples). Similar to 16S rRNA pre-processing, read counts were  
214 agglomerated to the genus before CLR transformation as described in 2.2. As samples were  
215 already pre-processed in the TCMA dataset, no further filtering or batch adjustment was  
216 required. Microbiome statistical analysis were performed similarly as 16S sequencing  
217 datasets. Metadata were obtained from cBioPortal for Cancer Genomics.<sup>104</sup>

218

## 219 **2.6 Microbiome correlation analysis with tumour microenvironment and survival** 220 **analysis**

221 The TME immune subtype and 29 functional gene expression signatures (FGES) scores were  
222 previously described by Bagaev et al. (2021) using transcriptomics datasets from TCGA.<sup>105</sup>  
223 The 29 FGES represents the major functional components and immune, stromal, and other  
224 cellular populations of the tumour.<sup>105</sup> Pearson's correlation test was applied to determine the  
225 correlation between FGES scores and selected bacteria genera. The four TME immune  
226 subtypes were – Desert (D), Fibrotic (F), Immune-enriched (IE), Immune-enriched/Fibrotic  
227 (IE/F) (Described in Supplementary Table 2).<sup>105</sup> Specifically, tissues with IE and IE/F  
228 phenotype contains high T-cell infiltration, while D and F phenotypes have low T-cell  
229 infiltration (Supplementary Table 2).<sup>105</sup> Using a cut-off of high (top 35<sup>th</sup> percentile) and low  
230 (bottom 35<sup>th</sup> percentile) CLR-abundance, the proportion of each patient within the four TME  
231 subtypes were determined, and survival analysis was performed. Since there were 153  
232 TCGA-HNSC samples with both FGES/TME subtypes and microbiome datasets, these

233 samples were used for subsequent correlation and survival analysis. Chi-squared ( $\chi^2$ ) test was  
234 performed in Prism9 to determine association between high/low bacterial genera CLR-  
235 abundance and proportion of patients within each tumour subtype.

236

237

238

## 239 **2.7 Statistical analysis**

240 For comparisons made between all unpaired tissue groups, Kruskal-Wallis test with  
241 Bonferroni's multiple comparison was used for comparisons made between all tissue groups  
242 unless stated otherwise. Post hoc Wilcoxon matched pairs signed rank test with Bonferroni's  
243 multiple comparison was used to compare differences between unpaired tissue samples. For  
244 all paired cancer and cancer-adjacent samples, Wilcoxon matched-pairs signed rank test was  
245 performed. Univariate and multivariate Cox proportional hazard model was performed using  
246 survminer in Rstudio v3.3.0. Statistical analysis was performed using RStudio v3.3.0 and  
247 Prism9.

248

## 249 **3 Results**

### 250 **3.1 Multivariate analysis identifies homogenous microbial abundance and functions between** 251 **cancer and cancer-adjacent samples, contrasting to non-cancer samples.**

252 The 16S rRNA amplicon datasets were obtained for 903 head and neck tissue types (396  
253 cancer, 251 cancer-adjacent, and 256 non-cancer) from 11 studies.<sup>37, 38, 41-45, 87-89</sup> Following  
254 sample processing and aggregation of 16S data at the genus level, a total of 177 distinct  
255 bacterial genera were identified. Differences in the microbiota and  $\beta$ -diversity between tissue  
256 types were assessed using PCA and PERMANOVA test (Figure 2A-2B). The  $\beta$ -diversity  
257 index was calculated for cancer ( $14.6 \pm 5.7$ ) and cancer-adjacent ( $15.0 \pm 5.5$ ) tissues,  
258 revealing similar levels of  $\beta$ -diversity. In contrast, non-cancer tissues ( $8.61 \pm 5.3$ ) exhibited  
259 lower  $\beta$ -diversity (PERMANOVA – Overall  $R^2 = 0.006$ ,  $p < 0.0001$ ) (Figure 2B). Post-hoc  
260 pairwise test identified significant differences in  $\beta$ -diversity between cancer and non-cancer  
261 ( $R^2 = 0.003$ ,  $p = 0.002$ ), cancer and cancer-adjacent ( $R^2 = 0.005$ ,  $p < 0.001$ ), and non-cancer  
262 and cancer-adjacent samples ( $R^2 = 0.007$ ,  $p < 0.001$ ) (Figure 2B). These findings were  
263 consistent with additional multivariate and univariate statistical analysis, ANOSIM ( $R =$   
264  $0.027$ ,  $p = 0.002$ ) and FFMANOVA ( $p < 0.0001$ ) (Supplementary Table 3).

265

266 Multivariate sparse partial least squares discriminant analysis (sPLS-DA) identified 116  
267 representative bacterial genera in sPLS-DA component 1 and 2 which were discriminant  
268 between tissue types (Figure 2C-E). The AUC values were computed for different sample  
269 comparisons: cancer versus others (AUC = 0.74,  $p < 0.05$ ), non-cancer versus others (AUC =  
270 0.91,  $p < 0.05$ ), and cancer-adjacent versus others (AUC = 0.84,  $p < 0.05$ ). These results  
271 demonstrate that sPLS-DA components 1 and 2 (Figure 2D) can effectively differentiate  
272 between tissue types. Lastly, majority of cancer and cancer-adjacent samples clustered

273 together and were distinct from non-cancer samples, as determined by Euclidean distance  
 274 metric (Figure 2E).

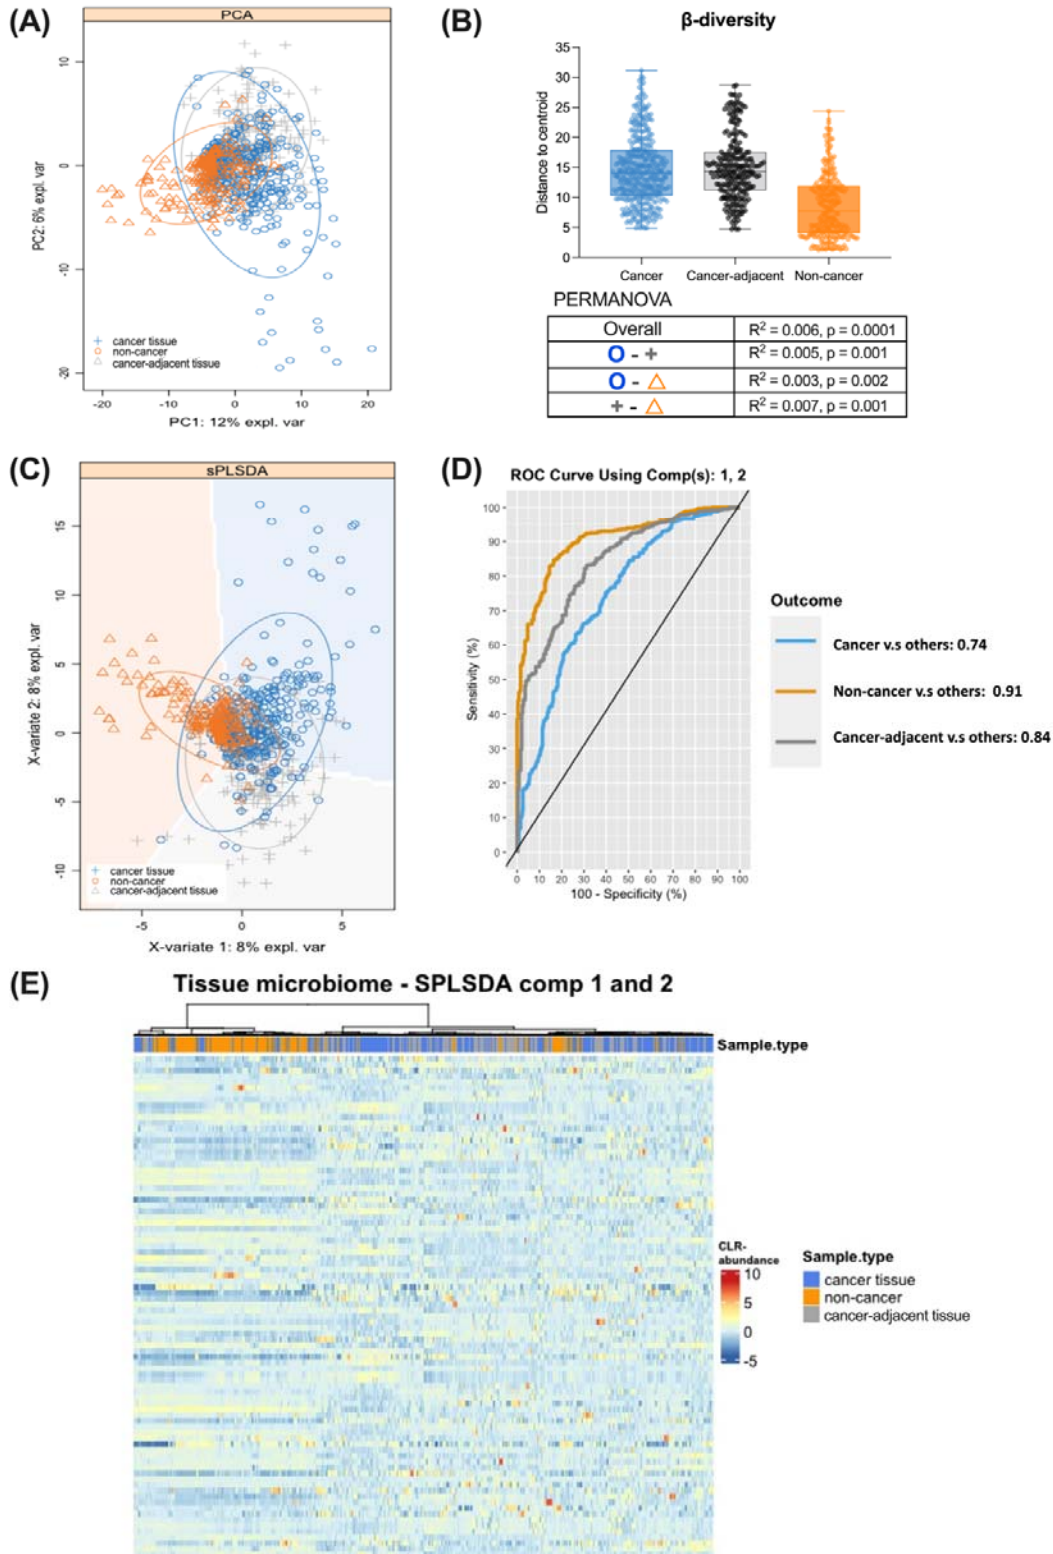

275

276 **Figure 2: Multivariate discriminant analysis (sPLS-DA and PERMANOVA) of tissue**  
277 **16S rRNA microbiota to discriminant between cancer, cancer-adjacent and non-cancer**  
278 **tissues.** (A) Principal coordinates analysis (PCA) plot of tissue CLR-abundance microbiota  
279 based on Euclidean distance. (B) Dispersion of  $\beta$ -diversity (top-right panel) for each sample  
280 type, with error bar representing 95% confidence interval. PERMANOVA test was  
281 performed with bacterial genera as variable for sample types. (C) sPLS-DA sample plot of  
282 16S rRNA tissue microbiota. Ellipse displays 95% confidence interval for each sample group.  
283 The batch-adjusted normalized abundance of tissue microbiota from 16S amplicon  
284 sequencing was compared between cancer, cancer-adjacent and non-cancer tissue samples.  
285 sPLS-DA identified 116 bacterial genera on component 1 and 2. (D) ROC curve and AUC  
286 values determined from sPLS-DA analysis was used to access discriminatory potential of  
287 sPLS-DA component 1 and 2. (E) Heatmap representing 86 bacterial genera after sPLS-DA  
288 discriminant analysis. Each column and row represent a unique sample and bacterial genera  
289 respectively, with OTUs clustered based on Euclidean distance and Ward linkage method.

290

291 **3.2 Univariate analysis identifies differences in microbial abundance and functions**  
292 **between sample types.**

293 Next, unpaired univariate analysis was applied to determine the differences between tissue  
294 types. Out of the 177 bacterial genera, 33 were identified as significantly different among  
295 tissue types using Kruskal-Wallis test ( $P_{\text{adjust}} < 0.05$ ) (Supplementary Table 4). Notably, 18 of  
296 these were also identified as representative bacterial genera in sPLS-DA discriminant  
297 analysis (Supplementary Table 4). These 33 genera are denoted as bacterial genera of interest  
298 (Supplementary Table 4). The top 20 differentially abundant genera, based on the effect size  
299 ( $\eta^2$ ), are presented in Figure 3. Post-hoc unpaired Wilcoxon test with Bonferroni-Dunn's  
300 multiple comparison test was performed on these genera to determine the mean differences in  
301 the central log ratio transform (CLR) abundance between tissue types (Figure 3A,

302 Supplementary Table 5). Since most published studies compared cancer to non-cancer, or  
303 cancer to cancer-adjacent tissues, we performed post-hoc test for these comparisons (Figure  
304 3B). We identified 27 out of 33 genera as significantly different ( $P_{\text{adjust}} (\#) < 0.05$ ) between  
305 cancer and non-cancer tissues (Figure 3A-3B, Supplementary Table 5). Non-cancer tissues  
306 contained more *Fretibacterium* (CLR-abundance diff. = 1.42, SE = 0.12), *Stenotrophomonas*  
307 (CLR-abundance diff. = 0.80, SE = 0.12) and *Tannerella* (CLR-abundance diff. = 0.71, SE =  
308 0.10), while cancer tissue had a greater CLR-abundance of *Neisseria* (CLR-abundance diff. =  
309 2.32, SE = 0.15), *Capnocytophaga* (CLR-abundance diff. = 2.02, SE = 0.15), and  
310 *Streptococcus* (CLR-abundance diff. = 1.98, SE = 0.19) (Figure 3A-3B). *Capnocytophaga*  
311 abundance in cancer tissues was consistent to previous findings<sup>46, 57, 85</sup>, while contradicting  
312 findings were identified for the abundance for *Streptococcus*<sup>38, 41, 52, 57, 85</sup> and  
313 *Fusobacterium*<sup>38, 41, 42, 52, 57, 58</sup>.

314

315 For cancer and cancer-adjacent tissue, 13 out of 33 bacterial genera were significantly  
316 different (post-hoc unpaired Wilcoxon test  $P_{\text{adjust}} (*) < 0.05$ ) (Figure 3A and 3C,  
317 Supplementary Table 5). Similar to many studies, *Fusobacterium* (CLR-abundance diff. =  
318 1.11, SE = 0.20) displayed significantly higher CLR-abundance in cancer tissue than cancer-  
319 adjacent tissue, while *Rothia* (CLR-abundance diff. = 0.92, SE = 0.18), *Stenotrophomonas*  
320 (CLR-abundance diff. = 1.33, SE = 0.15) and *Serratia* (CLR-abundance diff. = 0.70, SE =  
321 0.12) had higher CLR-abundances in cancer-adjacent tissue than cancer tissue (Figure 3A).<sup>36,</sup>  
322 <sup>37, 43, 45, 52, 55, 58, 59</sup> Additionally, we found that *Prevotella* was elevated in cancer tissue as  
323 compared to cancer-adjacent tissues.<sup>43, 45, 52, 55, 58</sup> Unlike previous studies, we did not observe  
324 any significant differences in *Streptococcus* abundance between cancer and cancer-adjacent  
325 tissues.<sup>36, 37, 45, 51, 52, 55, 59</sup>

326



327 Lastly, 28 of the 33 top bacterial genera were significantly different (post-hoc unpaired  
328 Wilcoxon test  $P_{\text{adjust}} < 0.05$ ) when comparing non-cancer to cancer-adjacent tissue samples  
329 (Figure 3A, Supplementary Table 5). Genera *Neisseria* (CLR-abundance diff. = 2.83, SE =  
330 0.19), *Rothia* (CLR-abundance diff. = 1.95, SE = 0.16) and *Streptococcus* (CLR-abundance  
331 diff. = 1.95, SE = 0.16) were higher in CLR-abundance in cancer-adjacent, while  
332 *Fusobacterium* (CLR-abundance diff. = 1.80, SE = 0.18) and *Prevotella* (CLR-abundance  
333 diff. = 1.28, SE = 0.20) were greater in CLR-abundance in non-cancer tissue (Figure 3A).

334

335 To provide functional insights to microbial abundance between cancer tissues and other tissue  
336 types, we applied Picrust2 to predict possible differences in MetaCyc pathway functional  
337 CLR-abundance.<sup>102</sup> After filtering low abundant functional pathways, we identified a total of  
338 365 MetaCyc pathways. Using Kruskal-Wallis test, 162 MetaCyc pathways were identified  
339 as significantly different among sample types ( $P_{\text{adjust}} < 0.05$ ) (Supplementary Table 5). Post-  
340 hoc analysis identified 129/162 and 7/162 pathways that were significantly different between  
341 cancer – non-cancer, and cancer – cancer-adjacent tissues comparisons respectively  
342 (Supplementary Table 6).

343

344 Cancer tissues, when compared to non-cancer tissues, were enriched in pathways involving  
345 the synthesis of ubiquinol, L-methionine, inosine-5'-phosphate and cysteine and metabolic  
346 pathways such as TCA cycle and pentose phosphate pathway, while non-cancer tissues were  
347 enriched in the degradation of L-lysine, L-glutamine, N-Acetylglucosamine (GlcNac), N-  
348 acetylmannosamine (ManNac), and N-acetylneuraminic acid (Figure 3C). Cancer tissues were  
349 more similar to cancer-adjacent tissues, albeit enrichment was identified in pathways  
350 involving biosynthesis of ppGpp (guanosine pentaphosphate and tetraphosphate), cis-  
351 vaccenate, L-asparatate, L-asparagine, cob(II)yrinate a,c-diamide and CMP-legionaminic acid,

352 and enrichment in pathways involving degradation of pyruvate and L-lysine, when compared  
 353 to cancer-adjacent tissues (Figure 3C).

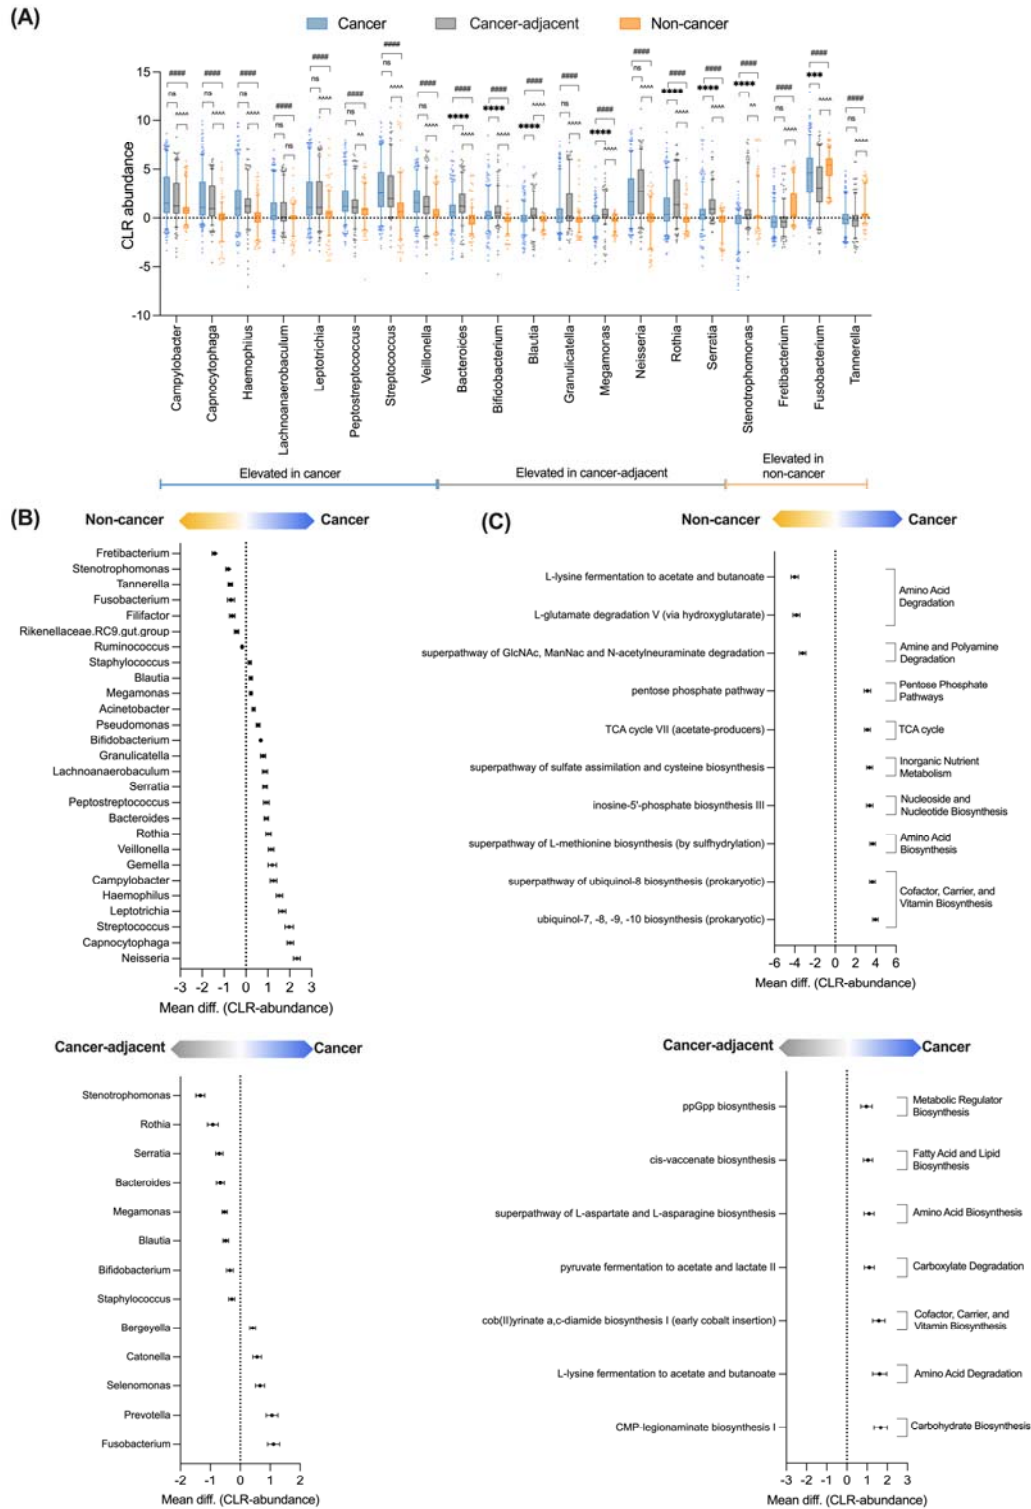

354

355 **Figure 3. Comparison of bacterial CLR-abundance and functional prediction between**  
356 **sample types.** (A) Top 20 bacterial genera (based on effect size) in CLR-normalized  
357 abundances between sample groups using Kruskal-Wallis test with Bonferroni's multiple  
358 comparison. 33 out of 177 genera were identified as significantly different ( $P_{\text{adjust}} < 0.05$ )  
359 using Kruskal-Wallis test. Post-hoc Wilcoxon test with Bonferroni-Dunn's multiple  
360 comparison was performed to identify group-wise differences between Cancer – Non-cancer  
361 (#), Cancer – Cancer-adjacent (\*), Non-cancer – Cancer-adjacent (^). Post-hoc unpaired  
362 Wilcoxon test with Bonferroni-Dunn's multiple comparison for (B) bacterial genera and (C)  
363 functional CLR-abundance for Cancer – Non-cancer (Top panel), and Cancer – Cancer-  
364 adjacent (Bottom panel).

365

### 366 **3.3 Paired cancer and cancer-adjacent tissues display similar bacterial abundance** 367 **differences using multiple sequencing techniques.**

368 To understand microbial abundance differences between cancer tissue and cancer-adjacent  
369 tissue within the same patients, we performed Wilcoxon matched-pairs signed rank test to  
370 identify changes in microbial diversity and abundance within paired tissue samples in the 16S  
371 rRNA datasets. Similar to unpaired data analysis, no significant differences in microbial  $\beta$ -  
372 diversity was identified between the patient's paired cancer and cancer-adjacent tissues  
373 (Supplementary Figure 2).

374 However, 76 bacterial genera were significantly different between paired tissue samples  
375 (Figure 4A, Supplementary Table 7). Bacterial genera with the greatest differences in CLR-  
376 abundance were then identified by using a cut-off of  $> 0.4$  and  $< -0.4$  (Figure 3A). Using this  
377 cut-off, we found that *Fusobacterium*, *Prevotella*, *Alloprevotella*, *Catonella*, *Selenomonas*  
378 and *Treponema* were elevated in cancer tissue vs cancer-adjacent tissue, while  
379 *Stenotrophomonas*, *Rothia*, *Granulicatella*, *Serratia*, *Anoxybacillus*, *Actinomyces* and

380 *Bacteroides* were greater in cancer-adjacent tissue compared to cancer tissue (Figure 4A-4B).  
381 Similarly, nine of these bacteria were also found to be significantly different in unpaired  
382 tissue analysis (Supplementary Table 4 and 7). Contrary to published studies on unpaired  
383 samples, *Streptococcus*, an abundant oral commensal, was not significantly different in our  
384 paired sample analysis.<sup>36, 37, 45, 51, 52, 55, 59</sup>  
385 To validate this finding, we probed the publicly available TCMA dataset, a repository  
386 containing microbiota reads derived from WGS of tissue samples.<sup>1</sup> Similar to the 16S rRNA  
387 dataset, we observed that cancer tissues from TCMA displayed significantly ( $p < 0.05$ ) higher  
388 CLR-abundance for genera *Fusobacterium*, *Selenomonas* and *Treponema*, while *Rothia* and  
389 *Actinomyces* were elevated ( $p < 0.05$ ) in cancer-adjacent tissues (Figure 4D). In the TCMA  
390 dataset, *Anoxybacillus*, *Serratia*, and *Stenotrophomonas* were not present due to pre-analysis  
391 filtering, while no significant differences in CLR-abundance were observed for *Prevotella*,  
392 *Catonella*, *Alloprevotella*, and *Bacteroides* (Figure 4C). Notably, similar trend in CLR-  
393 abundance between cancer and cancer-adjacent samples was still observed for *Prevotella*,  
394 *Catonella*, and *Alloprevotella* in TCMA dataset. Overall, 16S rRNA and TCMA WGS  
395 dataset showed similar trend for most bacteria genera, regardless of sequencing techniques.

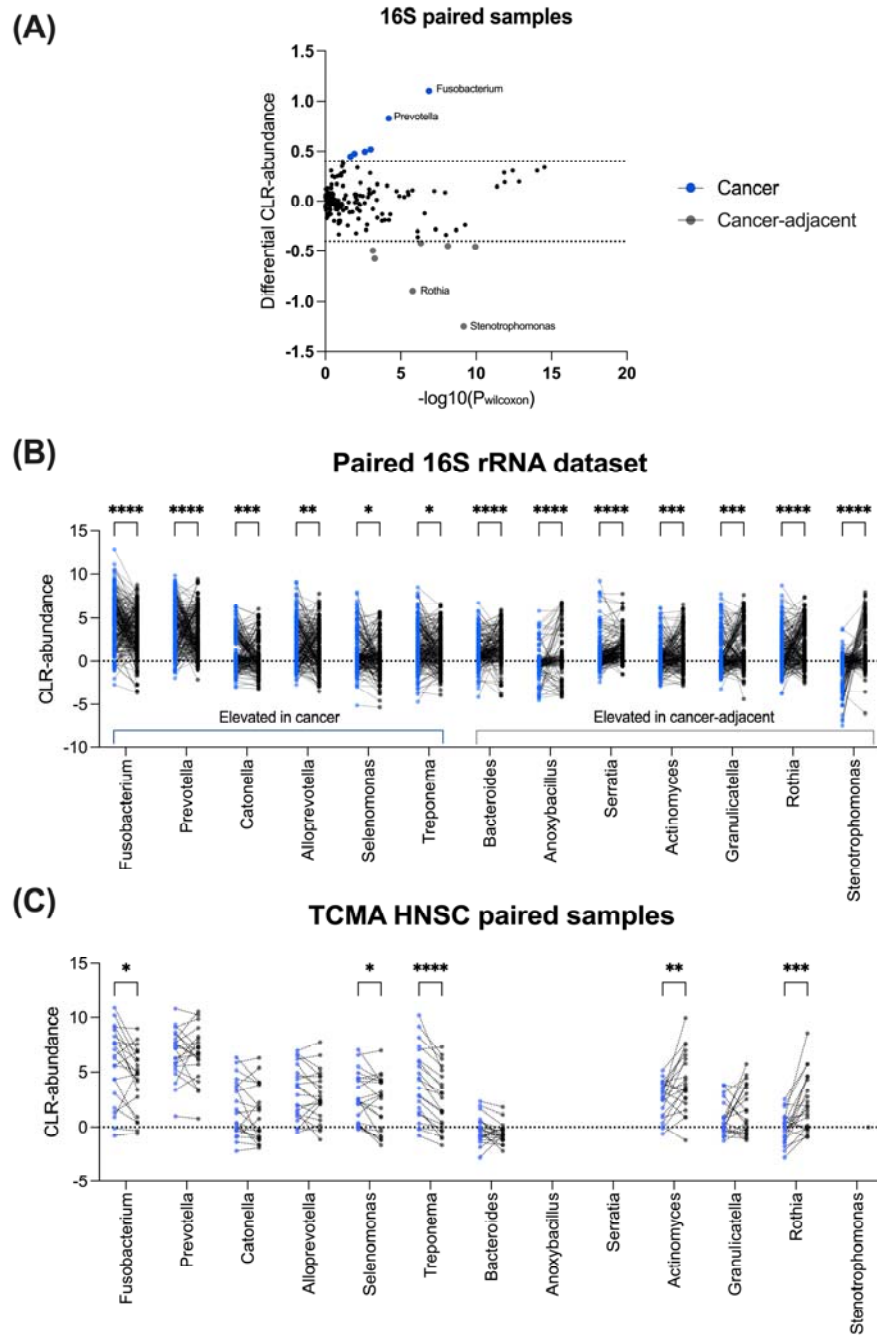

396

397 **Figure 4: Comparison of tissue microbiota in paired cancer and cancer-adjacent tissue**  
 398 **samples using different sequencing datasets. (A) Paired Wilcoxon matched-pairs signed**  
 399 **rank test on paired 16S rRNA sequencing cancer and cancer-adjacent tissue samples. 76**  
 400 **bacteria were significantly different in sample groups ( $p < 0.05$ ) using paired Wilcoxon**  
 401 **matched-pairs signed rank test and 13 bacteria genera were identified as top bacteria with**

402 differential CLR-abundance (Diff. CLR-abundance > 0.4 or < -0.4). Blue and red dot points  
403 represent bacteria that were higher in abundance in cancer and cancer-adjacent tissues  
404 respectively. CLR-abundance of paired cancer and cancer-adjacent samples from (B) 16s  
405 rRNA sequencing and (C) TCMA WGS sequencing datasets. Wilcoxon matched pairs signed  
406 rank test was performed for both 16s rRNA (n = 287) and TCMA (n = 22) datasets. \*p <  
407 0.05, \*\*p < 0.01, \*\*\*p < 0.001, \*\*\*\*p < 0.0001.

408

### 409 **3.4 Tissue microbiota diversity correlates with cancer functional gene expression** 410 **signatures.**

411 Since *Fusobacterium*, *Selenomonas*, *Treponema*, *Actinomyces*, and *Rothia* displayed  
412 significant differences between paired cancer and cancer-adjacent tissues, we performed  
413 correlation analyses to investigate the possible relationship between these genera and the  
414 tumour transcriptional profile and patient clinical features found in matched TCGA patients  
415 (n = 156).<sup>105</sup> Here, TCGA transcriptomic data were classified into 29 functional gene  
416 expression signatures (FGES), which represent major functional components and  
417 characteristics of cancer cell populations.<sup>105</sup> These 29 FGES can then be used to further  
418 classify cancers into four major immune subtypes (Desert, Fibrotic, Immune-enriched/non-  
419 fibrotic, and Immune-enriched/fibrotic).<sup>105</sup> We correlated the CLR-abundance of  
420 *Fusobacterium*, *Selenomonas*, *Treponema*, *Actinomyces*, and *Rothia* from TCGA-HNSC  
421 patients with their respective FGES scores and immune subtype.

422

423 We first correlated CLR-abundance with the FGE signatures. The CLR-abundance of  
424 *Fusobacterium* correlated (r > 0.3, p < 0.0001) with FGES related to angiogenesis,  
425 neutrophils and granulocyte traffic (Figure 5A). Other FGES such as matrix remodelling,  
426 protumour cytokines, MDSC traffic, M1 signature, antitumour cytokine, MHC1 and EMT

427 signatures also positively correlated ( $p < 0.05$ ) to CLR-abundance of *Fusobacterium* (Figure  
428 5A). The CLR-abundance of *Selenomonas* showed a positive correlation ( $p < 0.05$ ) to  
429 angiogenesis, neutrophil signature, granulocyte traffic and antitumour cytokines signatures,  
430 while negatively correlating ( $p < 0.05$ ) to B cells (Figure 4A). Lastly, CLR-abundance of  
431 *Treponema* displayed a negative correlation ( $p < 0.05$ ) to endothelium, T reg traffic, T reg,  
432 MHCII, Coactivation molecules, B cells, NK cells, Effector cells and T cells, while positively  
433 correlating to ( $p < 0.05$ ) neutrophils and granulocyte traffic (Figure 5A).

434

435 Next, we investigated how CLR-abundance correlated to tissue immune subtyping. Cancer  
436 tissues classified as immune deserts (D) and fibrotic (F) which lack immune cell enrichment  
437 correlated with higher *Fusobacterium* and *Treponema* CLR-abundance. On the other hand,  
438 cancer tissues that are immune-enriched / non-fibrotic (IE) or immune-enriched / fibrotic  
439 (IE/F) correlated with greater *Rothia*. No significant correlation in immune subtypes were  
440 observed for *Selenomonas* and *Actinomyces* (Figure 5B). To identify the differences in  
441 immune subtypes between high and low CLR-abundance of each bacterial genera, we further  
442 segregated patients based on the upper and lower 35% CLR-abundance quartiles. As  
443 expected, patients with IE and IE/F tumour subtypes showed significant association with low  
444 CLR-abundance of *Fusobacterium* (chi-square test,  $p = 0.04$ ). While not reaching statistical  
445 significance, more patients with IE and IE/F tumour subtypes have low CLR-abundance of  
446 *Selenomonas* (chi-square test,  $p = 0.33$ ) and *Treponema* (chi-square test,  $p = 0.11$ ), opposite  
447 to high CLR-abundance for *Rothia* (Figure 5C). Conversely, patients with D and F subtypes  
448 had higher CLR-abundance of *Fusobacterium*, *Selenomonas* or *Treponema* (Figure 5C).  
449 Lastly, the proportion of patients in each immune subtype were similar in high and low CLR-  
450 abundance *Actinomyces* groups. Taken together, these show that *Fusobacterium*,

451 *Selenomonas* or *Treponema* are associated with poor T-cell infiltration compared to *Rothia*  
 452 which may have implications in selecting patients suitable for immunotherapy.

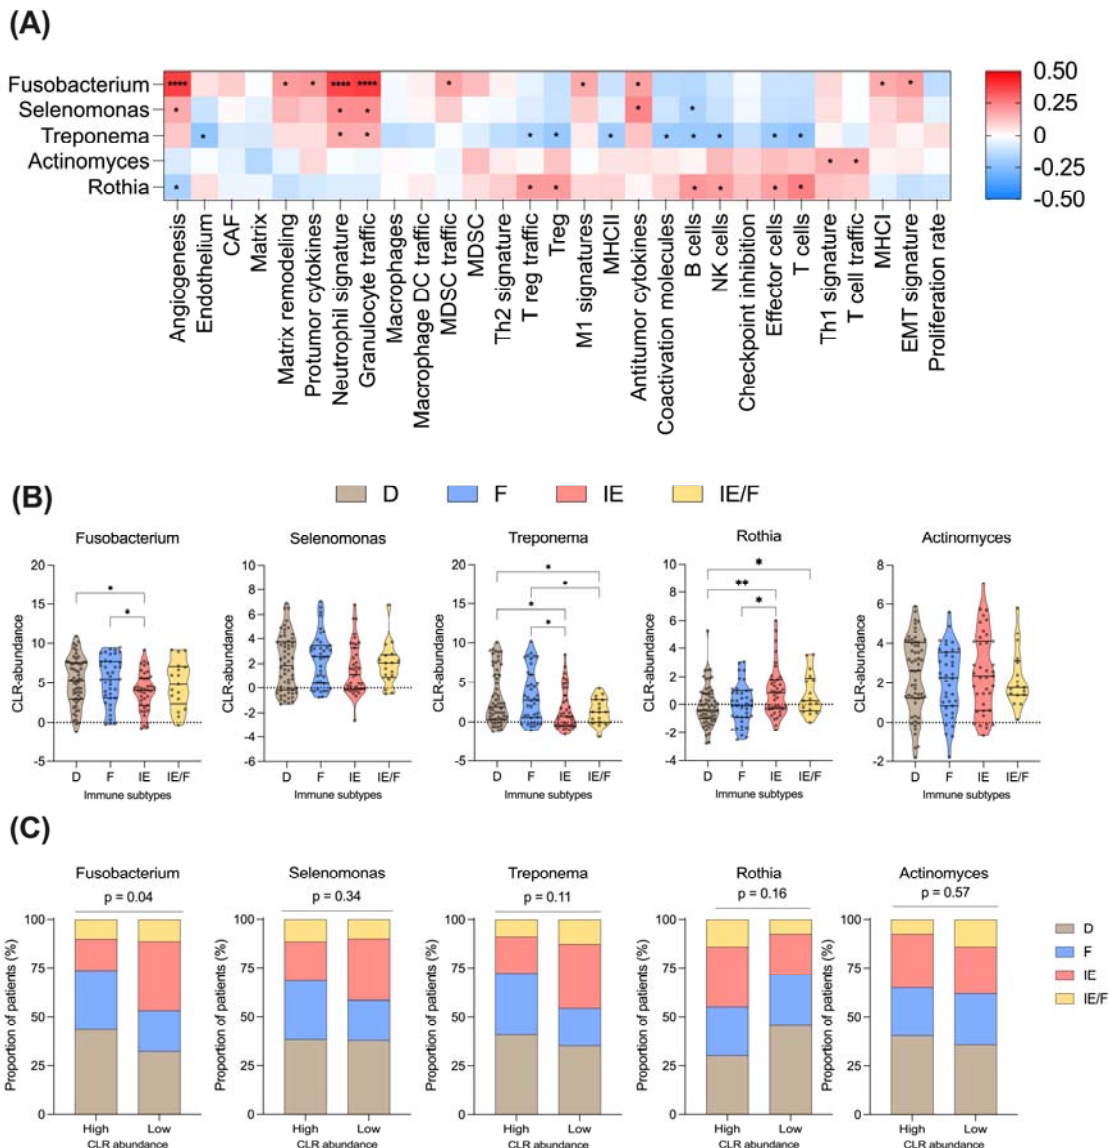

453

454 **Figure 5: Correlation analysis of *Fusobacterium*, *Selenomonas*, *Treponema*, *Rothia***  
 455 **and *Actinomyces* to the tumour transcriptional profiles.**

456 (A) 29 functional gene expression (FGES) signature scores derived from Bagaev et al  
 457 (2021) were used to correlated with CLR-abundance of genera *Fusobacterium*,  
 458 *Selenomonas*, *Treponema*, *Actinomyces*, and *Rothia*, using Pearson's correlation  
 459 method. Asterisk (\*) represents significant correlation ( $p < 0.05$ ), and red and blue



460 scales represents positive and negative correlation respectively. **(B)** The CLR-  
461 abundance of each bacterial genera within each tumour microenvironment immune  
462 subtype (D – Desert, F – Fibrotic, IE – Immune-enriched/Non-fibrotic, IE/F – Immune-  
463 enriched/Fibrotic). Kruskal-Wallis test with uncorrected Dunn’s test was performed to  
464 compare CLR-abundance in all immune groups. \* $p < 0.05$ , \*\* $p < 0.01$ . **(C)** The  
465 proportion of patients in each tumour immune subtype with high and low CLR-  
466 abundance in each bacterial genera. High and low bacteria CLR-abundance groups  
467 were determined by upper and lower 35% quartiles respectively. Chi-squared test was  
468 performed to determine association between high/low bacterial genera CLR-abundance  
469 and proportion of patients in each tumour subtype.

470

### 471 **3.5 Evaluation of microbiota abundance with clinical features and survival**

472 Univariate and multivariate Cox proportional hazard models were used to investigate the  
473 association between the intratumoral microbiota and clinical features. Univariate Cox  
474 proportional hazard model identified that current smokers (HR 2.235, 95% CI 1.146 – 4.359,  
475  $p = 0.018$ ), HPV-negative (HR 2.273, 95% CI 1.158 – 4.459,  $p = 0.017$ ), and low CLR-  
476 abundance of *Fusobacterium* (HR 0.8883, 95% CI 0.8183 – 0.9642,  $p = 0.005$ ) were risk  
477 factors for reduced overall survival (Table 2). Further multivariate Cox proportional hazard  
478 models identified that HPV-negative (HR 2.853, 95% CI 1.1991 – 6.7882,  $p = 0.0178$ ) and  
479 low CLR-abundance of *Fusobacterium* (Continuous: HR 0.8482, 95% CI 0.7758– 0.9273,  $p$   
480  $= 0.0003$ ; Low: HR 2.579, 95% CI 1.3687 – 4.860,  $p = 0.0034$ ) were independent hazards for  
481 overall survival, but not current smokers (Table 2).

482

483

484

485 Table 2: Univariate and multivariable Cox proportional hazard models for overall survival

|                      |            | n   | Univariate               |         | Multivariable            |          |
|----------------------|------------|-----|--------------------------|---------|--------------------------|----------|
|                      |            |     | HR (95% CI)              | p-value | HR (95% CI)              | p-value  |
| Age (years)          | < 65       | 106 |                          |         |                          |          |
|                      | ≥ 65       | 47  | 0.9832 (0.594 – 1.626)   | 0.947   |                          |          |
| Sex                  | Female     | 41  |                          |         |                          |          |
|                      | Male       | 112 | 0.868 (0.525 – 1.436)    | 0.581   |                          |          |
| Staging              | I          | 4   |                          |         |                          |          |
|                      | II         | 30  | 2.331 (0.302 – 17.97)    | 0.417   |                          |          |
|                      | III        | 31  | 2.275 (0.2950 – 17.54)   | 0.430   |                          |          |
|                      | IV         | 87  | 3.275 (0.4492 – 23.87)   | 0.242   |                          |          |
| HPV status           | Positive   | 37  |                          |         |                          |          |
|                      | Negative   | 107 | 2.273 (1.158 – 4.459)    | 0.017*  | 2.853 (1.1991 – 6.7882)  | 0.0178*  |
| Smoking              | Non-smoker | 37  |                          |         |                          |          |
|                      | Current    | 43  | 2.235 (1.146 – 4.359)    | 0.018*  | 1.3788 (0.5383 – 3.5317) | 0.50329  |
|                      | Previous   | 71  | 1.488 (0.7804 – 2.838)   | 0.227   | 0.7821 (0.3130 – 1.9545) | 0.59894  |
|                      | Continuous | 153 | 0.8883 (0.8183 - 0.9642) | 0.005** | 0.8482 (0.7758– 0.9273)  | 0.0003** |
| <i>Fusobacterium</i> | High       | 53  |                          |         |                          |          |
|                      | Low        | 53  | 2.0592 (1.17 – 3.625)    | 0.0123* | 2.579 (1.3687 – 4.860)   | 0.0034*  |
|                      | Continuous |     | 0.9712 (0.8714 – 1.082)  | 0.597   |                          |          |
| <i>Selenomonas</i>   | High       | 53  |                          |         |                          |          |
|                      | Low        | 52  | 1.205 (0.7094 – 2.048)   | 0.49    |                          |          |
|                      | Continuous | 153 | 0.9467 (0.8768 – 0.719)  | 0.162   |                          |          |
| <i>Treponema</i>     | High       | 53  |                          |         |                          |          |
|                      | Low        | 53  | 1.432 (0.8092 – 2.535)   | 0.217   |                          |          |
|                      | Continuous | 153 | 1.029 (0.8936 – 1.184)   | 0.694   |                          |          |
| <i>Rothia</i>        | High       | 54  |                          |         |                          |          |
|                      | Low        | 54  | 0.6552 (0.3585 – 1.198)  | 0.17    |                          |          |
|                      | Continuous | 153 | 0.9652 (0.8512 – 1.094)  | 0.58    |                          |          |
| <i>Actinomyces</i>   | High       | 53  |                          |         |                          |          |
|                      | Low        | 52  | 1.006 (0.5679 – 1.783)   | 0.983   |                          |          |

486

#### 487 **4 Discussion:**

488 Several studies have investigated the microbial signature in HNSC using different sequencing  
489 approaches and sample types, such as tissues, swabs, and oral fluids. However, these studies  
490 have reported inconsistent findings regarding the presence of specific bacterial genera.  
491 Consequently, a consensus microbial signature for head and neck tissues has yet to be  
492 established. In this study, we aimed to address this gap by conducting a meta-analysis of 11  
493 studies and presenting a consensus tissue microbiota signature for head and neck tissues. We  
494 analyzed 16S rRNA sequencing datasets from 903 tissue samples, including 396 cancer  
495 tissues, 251 cancer-adjacent tissues, and 256 non-cancer tissues. Our analysis revealed  
496 significant differences in the abundance of 33 bacterial genera among the various tissue  
497 types. Specifically, we observed that cancer tissues and cancer-adjacent tissues exhibited  
498 greater similarity to each other compared to non-cancer tissues. These findings suggest  
499 distinct microbial profiles in cancer and cancer-adjacent tissues compared to non-cancer  
500 tissues. Non-cancer tissues exhibited the lowest differences in  $\beta$ -diversity and contained  
501 elevated levels of bacterial genera such as *Tannerella*, *Fretibacterium*, *Stenotrophomonas*,  
502 *Fusobacterium*, and *Prevotella* (Figure 6A). While cancer and cancer-adjacent tissues  
503 displayed similar microbiota based on  $\beta$ -diversity indexes, further analysis using paired and  
504 unpaired univariate methods enabled differentiation of these tissues at the genera level  
505 (Figure 6B). Importantly, these abundance signatures were validated using additional data  
506 from TCMA. Matching TCMA samples with transcriptomic data derived from TCGA) and  
507 clinical features provided insights into the contributions of individual genera in HNSC.  
508 Notably, we found that a high abundance of *Fusobacterium* was associated with better overall  
509 survival in HNSC patients Overall, our study contributes to the establishment of a consensus  
510 tissue microbiota signature for HNSC, shedding light on the distinct microbial profiles in  
511 different tissue types and their potential implications for clinical outcomes.

(A)

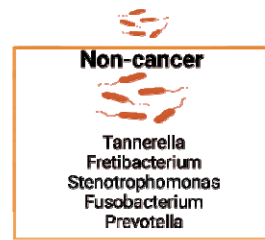

(B)

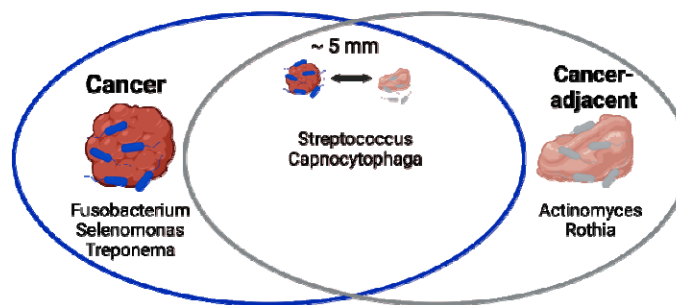

512

513 **Figure 6: Summary of bacteria genera within cancer, cancer-adjacent and non-cancer**  
514 **tissue samples. (A)** Elevated microbiota within non-cancer tissues compared to cancer and  
515 cancer-adjacent tissues. **(B)** Elevated bacteria genera between cancer and cancer-adjacent  
516 tissues.

517

518 Both multivariate and univariate discriminant analyses was able to differentiate different  
519 tissue sample types based on microbial abundance. As previously reported, cancer and  
520 cancer-adjacent tissues were more similar in microbial diversity when compared to non-  
521 cancer tissues.<sup>36-38, 42, 43, 45, 49, 51, 52, 55, 57-59, 85</sup> At the genus level, both paired and unpaired

522 abundance analysis of cancer and cancer-adjacent tissues showed consistent enrichment for  
523 *Fusobacterium* and *Rothia* in cancer tissues.<sup>36, 37, 45, 52, 55, 58, 59</sup> In contrast, *Prevotella* was

524 enriched within cancer tissues compared to cancer-adjacent tissues, and no differences were

525 observed for *Streptococcus*.<sup>36-38, 41, 43, 45, 51, 52, 55, 57-59, 85</sup>

526

527 Previous studies have reported conflicting result where *Fusobacterium* was more in cancer  
528 tissues as compared to non-cancer and cancer-adjacent tissues.<sup>38, 42, 52, 57, 58</sup> However, we  
529 found that *Fusobacterium* was most abundant in non-cancer tissues. *Fusobacterium* is an  
530 abundant commensal bacteria found largely in the oral cavity (buccal, hard palate, gingiva,  
531 tonsils, tongue) and saliva of healthy individuals, suggesting a potential role within the  
532 healthy oral microbiota.<sup>106-108</sup> *In vitro* experiments in HNSC cell lines showed that  
533 *Fusobacterium nucleatum* infection promotes cancer cell invasion, proliferation, autophagy,  
534 and PD-L1 expression.<sup>109-113</sup> It is unknown whether there are strain and species level  
535 differences found in *Fusobacterium* isolated in cancer and non-cancer tissues to explain such  
536 seemingly contradictory findings. Additionally, non-cancer tissue from cancer patients may  
537 also have different tissue microbiota profiles from healthy donor tissues which is currently  
538 unavailable for this study. Also, most of the experiments showing an oncogenic role for *F.*  
539 *nucleatum* were carried out *in vitro* and thus did not consider a potential mitigating role of the  
540 immune system. Moreover, the abundance of *F. nucleatum* both in absolute terms and  
541 relative to other bacteria present in the tumour microbiota might influence the oncogenic  
542 potential of *F. nucleatum*. Further experiments are required to evaluate the role of  
543 *Fusobacterium* in HNSC.

544

545 We observed that *Streptococcus*, another highly abundant oral commensal genera<sup>106-108</sup>, was  
546 increased specifically in cancer and cancer-adjacent tissue when compared to non-cancer  
547 tissues. However, there was no significant difference in *Streptococcus* abundance between  
548 cancer and cancer-adjacent tissues. Within the oral cavity, certain pathogenic *Streptococcus*  
549 species, like *S. mutans*, can contribute to periodontitis by acidifying the environment.<sup>114</sup> In  
550 oral cancer, *S. mutans* has been shown to promote tumour proliferation and invasion,

551 potentially through upregulation of IL-6 in infected cells<sup>115</sup>. On the other hand, *Streptococcus*  
552 species from the *mitis* (*S. oralis*, *S. parasanguinis*, *S. mitis*) and *sanguinis* (*S. sanguinis*, *S.*  
553 *gordonii*) groups, can break down lactic acid or pyruvate into hydrogen peroxide, thereby  
554 antagonising pathogenic species such as *S. mutans*.<sup>114</sup> In oral cancer, *S. mitis*, *S. salivarius*, *S.*  
555 *anginosus* were found to display anti-tumour effects, including reducing cancer cell viability  
556 and promoting CD8<sup>+</sup> cytotoxic T cell responses<sup>116-120</sup>. These findings indicate that the  
557 abundance of specific *Streptococcus* species may contribute to pathogenesis, disease severity,  
558 or exert anti-tumour effects. It is important to note that these studies underscore the  
559 limitations of identifying microbiota at the genus level using short-read 16S rRNA  
560 sequencing. To address these limitations, recent advances in sequencing technologies such as  
561 long-read 16S rRNA amplicon sequencing (e.g., PacBio, Nanopore) or shotgun  
562 metagenomics can be employed to reveal species- or strain-specific diversity within the  
563 microbiota.<sup>121-123</sup> Such advancements can provide a more comprehensive understanding of  
564 the specific species and strains that play a role in oral cancer pathogenesis and anti-tumour  
565 effects.

566

567 To compare the metabolic potential of different head and neck tissue types, a functional  
568 prediction analysis was performed using PICRUSt2 on the 16S rRNA sequencing data. The  
569 analysis revealed an enrichment of several amino acids and metabolites, including L-  
570 aspartate, L-asparagine, acetate, butanoate, and lactate, in cancer tissues compared to non-  
571 cancer and cancer-adjacent tissues. L-aspartate and L-asparagine, as substrates for nucleotide  
572 biosynthesis and regulators of amino acid homeostasis and anabolic metabolism, have been  
573 reported to promote tumour proliferation.<sup>124-126</sup> Butanoate, acetate, and lactate can serve as  
574 energy sources for cells by converting into acetyl-CoA, which can then be utilized in the  
575 tricarboxylic acid (TCA) cycle to produce ATP.<sup>127-130</sup> The role of butanoate in tumorigenesis

576 depends on the specific tumour and the TME, as it can exhibit tumour-promoting or  
577 suppressive properties.<sup>31, 131-133</sup> Lactate, a well-studied metabolite produced by both cancer  
578 cells and bacteria, can modulate the TME by inactivating natural killer cells, promoting  
579 polarisation of M2-like tumour-associated macrophages, and stimulating the growth of T-  
580 regulatory cells.<sup>134</sup> Collectively, these findings suggest that bacteria infiltrating HNSC tissues  
581 possess functional capacities that may promote cancer progression. Further validation studies  
582 are warranted to better understand the role of these metabolic pathways in HNSC and the  
583 contribution of bacteria in shaping the TME.

584

585 We further explored the relationship between the abundance of the five cancer-associated  
586 bacterial genera, *Fusobacterium*, *Selenomonas*, *Treponema*, *Actinomyces*, and *Rothia*, and the  
587 TME phenotype and clinical outcomes. *Fusobacterium* was associated with a lack of T-cell  
588 immune infiltration in HNSC, similar to colorectal and oesophageal cancers.<sup>21, 135-137</sup>  
589 Furthermore, *Fusobacterium* can chemoattract neutrophils via release of SCFA and can also  
590 modulate neutrophils and endothelial cell functions *in vitro*.<sup>138-142</sup> Interestingly, we observed  
591 that patients with low levels of *Fusobacterium* within the tumour tissue had shorter overall  
592 survival, consistent to previous reports in HNSC.<sup>45, 60, 143</sup> In contrast, opposite findings have  
593 been reported for colorectal, gastric and oesophageal cancers, suggesting that *Fusobacterium*  
594 may have a different role in HNSC.<sup>144-147</sup> We also found that *Treponema* correlated with an  
595 lack of immune infiltration in HNSC. Although the effect of *Treponema* infiltration in HNSC  
596 is still unknown, these bacteria have been associated with an upregulation of immune  
597 suppressive cells and can suppress innate immune responses.<sup>148-150</sup> In our analysis, *Rothia*  
598 was found to correlate with an immune-enriched TME. Limited information is available  
599 regarding the role of *Rothia* in cancer; however, *Rothia dentocariosa* has been shown to  
600 induce Toll-like receptor 2 (TLR-2) mediated TNF-alpha inflammatory response in human

601 embryonic kidney cells and THP-1 monocytes.<sup>151</sup> *Selenomonas* and *Actinomyces* did not  
602 significantly correlate with TME subtypes in our analysis. However, *Selenomonas sputigena*  
603 infected gingival epithelial cells can promote neutrophil and monocyte recruitment.<sup>152</sup>  
604 *Actinomyces* has been associated with young-onset colorectal cancers, showing a preferential  
605 localisation with cancer-associated fibroblasts in the TME.<sup>153</sup> These findings underscore the  
606 importance of validating and understanding the underlying mechanisms through which these  
607 bacteria can modulate the tumour microenvironment in HNSC.

608

609 This study represents the first comprehensive comparison of 16S rRNA (V3-V5) microbial  
610 sequencing across multiple studies to identify consensus HNSC-associated microbiota  
611 signatures in cancer, cancer-adjacent and non-cancer tissues. To ensure consistency, a  
612 uniform bioinformatics approach was employed. However, it is important to acknowledge the  
613 inherent limitations of this study. Variations in sample collection, preparation, and  
614 sequencing among different laboratories introduce batch effects that could contribute to the  
615 inconsistencies observed across different reports. To mitigate these effects, we applied  
616 PLSDA-batch adjustment to the pooled datasets.<sup>91</sup> Conventional short-read 16S rRNA  
617 sequencing provides information only up to the genus level, which restricts the ability to  
618 identify specific bacterial species or strains that may be relevant to disease outcomes.<sup>121</sup>  
619 Overcoming this limitation would require advanced sequencing technologies such as long-  
620 read 16S rRNA amplicon sequencing or shotgun metagenomics to reveal species- or strain-  
621 level diversity within the microbiota. Furthermore, the availability of complete clinical  
622 metadata in published datasets reporting 16S rRNA sequencing is limited, restricting our  
623 ability to make comprehensive clinical associations. Therefore, our clinical associations were  
624 primarily based on TCMA/TCGA datasets. Despite these limitations, this study confirms  
625 distinct differences in the microbiota composition among cancer, cancer-adjacent and non-



626 cancer HNSC tissue samples. The strength of our study lies in the meta-analysis of a  
627 substantial number of samples, totalling 903. Additionally, our analysis indicates that a high  
628 load of *Fusobacterium* within HNSC tissues may be associated with a favourable survival  
629 outcome. The correlation analysis of the microbiota with functional predictions, functional  
630 gene enrichment signature, and immune subtyping of the tumour and TME provides novel  
631 avenues for further exploration.

632

633 In conclusion, our study establishes a consensus microbial signature for head and neck  
634 tissues, shedding light on the distinct microbial profiles present in head and neck cancer  
635 (HNSC). These findings have the potential to serve as targets for future treatment approaches  
636 in HNSC. Nevertheless, it is crucial to acknowledge the limitations identified in our study  
637 and recognize the need for further research to address these limitations. Additional  
638 investigations are required to gain a deeper understanding of the functional implications of  
639 the identified microbiota differences in HNSC. By addressing these gaps, we can advance our  
640 knowledge and pave the way for more effective therapeutic interventions in HNSC.

641

## 642 **5. Conflict of Interest**

643 Authors state no conflict of interest.

644

## 645 **6. Author Contributions**

646 Conceptualisation K.Y.,K.F.; methodology, investigation, and data analysis, K.Y.,R.L.,F.W.,  
647 E.S., G.B., and L.M.; resources A.P.,P.W. and S.V.; writing - original draft preparation, K.Y.,  
648 E.S., S.V., and K.F; writing-review and editing, K.Y., G.B., E.S., A.P., P.W., R.V., S.V., and  
649 K.F.; supervision R.V.,A.P., S.V., and K.F.; funding acquisition, A.P.,P.W., and S.V.; All  
650 authors have read and agreed to the published version of the manuscript.

651 **7. Acknowledgments**

652 This work is supported by an NHMRC investigator grant APP1196832 to P.W., a The  
653 Garnett Passe and Rodney Williams Senior Fellowship to S.V., and The University of  
654 Adelaide Postgraduate Research Scholarship to K.Y., R.L., F.W and L.M. Illustration in  
655 Figure 6 was generated using Biorender.

656

657 **8. Data Availability Statement**

658 The data used to support the findings of this study are included within the article and within  
659 supplementary material.

660 **Reference:**

- 661 1. Dohlman AB, Arguijo Mendoza D, Ding S, et al. The cancer microbiome atlas: a pan-  
662 cancer comparative analysis to distinguish tissue-resident microbiota from contaminants. *Cell*  
663 *Host Microbe*. Feb 10 2021;29(2):281-298.e5. doi:10.1016/j.chom.2020.12.001
- 664 2. Nejman D, Livyatan I, Fuks G, et al. The human tumor microbiome is composed of  
665 tumor type-specific intracellular bacteria. *Science*. May 29 2020;368(6494):973-980.  
666 doi:10.1126/science.aay9189
- 667 3. Xuan C, Shamonki JM, Chung A, et al. Microbial dysbiosis is associated with human  
668 breast cancer. *PLoS One*. 2014;9(1):e83744. doi:10.1371/journal.pone.0083744
- 669 4. Jain T, Sharma P, Are AC, Vickers SM, Dudeja V. New Insights Into the Cancer-  
670 Microbiome-Immune Axis: Decrypting a Decade of Discoveries. *Front Immunol*.  
671 2021;12:622064. doi:10.3389/fimmu.2021.622064
- 672 5. Xavier JB, Young VB, Skufca J, et al. The Cancer Microbiome: Distinguishing Direct  
673 and Indirect Effects Requires a Systemic View. *Trends Cancer*. Mar 2020;6(3):192-204.  
674 doi:10.1016/j.trecan.2020.01.004
- 675 6. Yang L, Li A, Wang Y, Zhang Y. Intratumoral microbiota: roles in cancer initiation,  
676 development and therapeutic efficacy. *Signal Transduct Target Ther*. Jan 16 2023;8(1):35.  
677 doi:10.1038/s41392-022-01304-4
- 678 7. Vétizou M, Pitt JM, Daillère R, et al. Anticancer immunotherapy by CTLA-4  
679 blockade relies on the gut microbiota. *Science*. Nov 27 2015;350(6264):1079-84.  
680 doi:10.1126/science.aad1329
- 681 8. Sivan A, Corrales L, Hubert N, et al. Commensal Bifidobacterium promotes  
682 antitumor immunity and facilitates anti-PD-L1 efficacy. *Science*. Nov 27  
683 2015;350(6264):1084-9. doi:10.1126/science.aac4255
- 684 9. Iida N, Dzutsev A, Stewart CA, et al. Commensal bacteria control cancer response to  
685 therapy by modulating the tumor microenvironment. *Science*. Nov 22 2013;342(6161):967-  
686 70. doi:10.1126/science.1240527
- 687 10. Viaud S, Saccheri F, Mignot G, et al. The intestinal microbiota modulates the  
688 anticancer immune effects of cyclophosphamide. *Science*. Nov 22 2013;342(6161):971-6.  
689 doi:10.1126/science.1240537
- 690 11. Fu A, Yao B, Dong T, et al. Tumor-resident intracellular microbiota promotes  
691 metastatic colonization in breast cancer. *Cell*. Apr 14 2022;185(8):1356-1372.e26.  
692 doi:10.1016/j.cell.2022.02.027
- 693 12. Geller LT, Barzily-Rokni M, Danino T, et al. Potential role of intratumor bacteria in  
694 mediating tumor resistance to the chemotherapeutic drug gemcitabine. *Science*. Sep 15  
695 2017;357(6356):1156-1160. doi:10.1126/science.aah5043
- 696 13. Yu T, Guo F, Yu Y, et al. *Fusobacterium nucleatum* Promotes Chemoresistance to  
697 Colorectal Cancer by Modulating Autophagy. *Cell*. Jul 27 2017;170(3):548-563.e16.  
698 doi:10.1016/j.cell.2017.07.008
- 699 14. Spanogiannopoulos P, Kyaw TS, Guthrie BGH, et al. Host and gut bacteria share  
700 metabolic pathways for anti-cancer drug metabolism. *Nat Microbiol*. Oct 2022;7(10):1605-  
701 1620. doi:10.1038/s41564-022-01226-5
- 702 15. Gur C, Ibrahim Y, Isaacson B, et al. Binding of the Fap2 protein of *Fusobacterium*  
703 *nucleatum* to human inhibitory receptor TIGIT protects tumors from immune cell attack.  
704 *Immunity*. Feb 17 2015;42(2):344-355. doi:10.1016/j.immuni.2015.01.010
- 705 16. Kalaora S, Nagler A, Nejman D, et al. Identification of bacteria-derived HLA-bound  
706 peptides in melanoma. *Nature*. Apr 2021;592(7852):138-143. doi:10.1038/s41586-021-  
707 03368-8

- 708 17. Naghavian R, Faigle W, Oldrati P, et al. Microbial peptides activate tumour-  
709 infiltrating lymphocytes in glioblastoma. *Nature*. May 2023;617(7962):807-817.  
710 doi:10.1038/s41586-023-06081-w
- 711 18. Abed J, Emgård JE, Zamir G, et al. Fap2 Mediates *Fusobacterium nucleatum*  
712 Colorectal Adenocarcinoma Enrichment by Binding to Tumor-Expressed Gal-GalNAc. *Cell*  
713 *Host Microbe*. Aug 10 2016;20(2):215-25. doi:10.1016/j.chom.2016.07.006
- 714 19. Parhi L, Alon-Maimon T, Sol A, et al. Breast cancer colonization by *Fusobacterium*  
715 *nucleatum* accelerates tumor growth and metastatic progression. *Nat Commun*. Jun 26  
716 2020;11(1):3259. doi:10.1038/s41467-020-16967-2
- 717 20. Zhang S, Yang Y, Weng W, et al. *Fusobacterium nucleatum* promotes  
718 chemoresistance to 5-fluorouracil by upregulation of BIRC3 expression in colorectal cancer.  
719 *J Exp Clin Cancer Res*. Jan 10 2019;38(1):14. doi:10.1186/s13046-018-0985-y
- 720 21. Wu J, Li Q, Fu X. *Fusobacterium nucleatum* Contributes to the Carcinogenesis of  
721 Colorectal Cancer by Inducing Inflammation and Suppressing Host Immunity. *Transl Oncol*.  
722 Jun 2019;12(6):846-851. doi:10.1016/j.tranon.2019.03.003
- 723 22. Gur C, Maalouf N, Shhadeh A, et al. *Fusobacterium nucleatum* suppresses anti-tumor  
724 immunity by activating CEACAM1. *Oncoimmunology*. 2019;8(6):e1581531.  
725 doi:10.1080/2162402x.2019.1581531
- 726 23. Yoon Y, Kim G, Jeon BN, Fang S, Park H. *Bifidobacterium* Strain-Specific Enhances  
727 the Efficacy of Cancer Therapeutics in Tumor-Bearing Mice. *Cancers (Basel)*. Feb 25  
728 2021;13(5)doi:10.3390/cancers13050957
- 729 24. Asadollahi P, Ghanavati R, Rohani M, Razavi S, Esghaei M, Talebi M. Anti-cancer  
730 effects of *Bifidobacterium* species in colon cancer cells and a mouse model of carcinogenesis.  
731 *PLoS One*. 2020;15(5):e0232930. doi:10.1371/journal.pone.0232930
- 732 25. Rossi T, Vergara D, Fanini F, Maffia M, Bravaccini S, Pirini F. Microbiota-Derived  
733 Metabolites in Tumor Progression and Metastasis. *Int J Mol Sci*. Aug 12  
734 2020;21(16)doi:10.3390/ijms21165786
- 735 26. Krautkramer KA, Fan J, Bäckhed F. Gut microbial metabolites as multi-kingdom  
736 intermediates. *Nat Rev Microbiol*. Feb 2021;19(2):77-94. doi:10.1038/s41579-020-0438-4
- 737 27. Bachem A, Makhlof C, Binger KJ, et al. Microbiota-Derived Short-Chain Fatty  
738 Acids Promote the Memory Potential of Antigen-Activated CD8(+) T Cells. *Immunity*. Aug  
739 20 2019;51(2):285-297.e5. doi:10.1016/j.immuni.2019.06.002
- 740 28. Wang W, Fang D, Zhang H, et al. Sodium Butyrate Selectively Kills Cancer Cells and  
741 Inhibits Migration in Colorectal Cancer by Targeting Thioredoxin-1. *Onco Targets Ther*.  
742 2020;13:4691-4704. doi:10.2147/ott.S235575
- 743 29. Liang Y, Rao Z, Du D, Wang Y, Fang T. Butyrate prevents the migration and  
744 invasion, and aerobic glycolysis in gastric cancer via inhibiting Wnt/ $\beta$ -catenin/c-Myc  
745 signaling. *Drug Dev Res*. May 2023;84(3):532-541. doi:10.1002/ddr.22043
- 746 30. He Y, Fu L, Li Y, et al. Gut microbial metabolites facilitate anticancer therapy  
747 efficacy by modulating cytotoxic CD8(+) T cell immunity. *Cell Metab*. May 4  
748 2021;33(5):988-1000.e7. doi:10.1016/j.cmet.2021.03.002
- 749 31. Okumura S, Konishi Y, Narukawa M, et al. Gut bacteria identified in colorectal  
750 cancer patients promote tumorigenesis via butyrate secretion. *Nat Commun*. Sep 28  
751 2021;12(1):5674. doi:10.1038/s41467-021-25965-x
- 752 32. Zaiatz-Bittencourt V, Jones F, Tosetto M, et al. Butyrate limits human natural killer  
753 cell effector function. *Sci Rep*. Feb 15 2023;13(1):2715. doi:10.1038/s41598-023-29731-5
- 754 33. Bender MJ, McPherson AC, Phelps CM, et al. Dietary tryptophan metabolite released  
755 by intratumoral *Lactobacillus reuteri* facilitates immune checkpoint inhibitor treatment. *Cell*.  
756 Apr 27 2023;186(9):1846-1862.e26. doi:10.1016/j.cell.2023.03.011

- 757 34. Tintelnot J, Xu Y, Lesker TR, et al. Microbiota-derived 3-IAA influences  
758 chemotherapy efficacy in pancreatic cancer. *Nature*. Mar 2023;615(7950):168-174.  
759 doi:10.1038/s41586-023-05728-y
- 760 35. Hezaveh K, Shinde RS, Klötgen A, et al. Tryptophan-derived microbial metabolites  
761 activate the aryl hydrocarbon receptor in tumor-associated macrophages to suppress anti-  
762 tumor immunity. *Immunity*. Feb 8 2022;55(2):324-340.e8. doi:10.1016/j.immuni.2022.01.006
- 763 36. Chang C, Geng F, Shi X, et al. The prevalence rate of periodontal pathogens and its  
764 association with oral squamous cell carcinoma. *Appl Microbiol Biotechnol*. Feb  
765 2019;103(3):1393-1404. doi:10.1007/s00253-018-9475-6
- 766 37. Zhou J, Wang L, Yuan R, et al. Signatures of Mucosal Microbiome in Oral Squamous  
767 Cell Carcinoma Identified Using a Random Forest Model. *Cancer Manag Res*.  
768 2020;12:5353-5363. doi:10.2147/cmar.S251021
- 769 38. Torralba MG, Aleti G, Li W, et al. Oral Microbial Species and Virulence Factors  
770 Associated with Oral Squamous Cell Carcinoma. *Microb Ecol*. Nov 2021;82(4):1030-1046.  
771 doi:10.1007/s00248-020-01596-5
- 772 39. Henrich B, Rumming M, Sczyrba A, et al. Mycoplasma salivarium as a dominant  
773 coloniser of Fanconi anaemia associated oral carcinoma. *PLoS One*. 2014;9(3):e92297.  
774 doi:10.1371/journal.pone.0092297
- 775 40. Chan JYK, Ng CWK, Lan L, et al. Restoration of the Oral Microbiota After Surgery  
776 for Head and Neck Squamous Cell Carcinoma Is Associated With Patient Outcomes. *Front*  
777 *Oncol*. 2021;11:737843. doi:10.3389/fonc.2021.737843
- 778 41. De Martin A, Lütge M, Stanossek Y, et al. Distinct microbial communities colonize  
779 tonsillar squamous cell carcinoma. *Oncoimmunology*. 2021;10(1):1945202.  
780 doi:10.1080/2162402x.2021.1945202
- 781 42. Zakrzewski M, Gannon OM, Panizza BJ, Saunders NA, Antonsson A. Human  
782 papillomavirus infection and tumor microenvironment are associated with the microbiota in  
783 patients with oropharyngeal cancers-pilot study. *Head Neck*. Nov 2021;43(11):3324-3330.  
784 doi:10.1002/hed.26821
- 785 43. Sarkar P, Malik S, Laha S, et al. Dysbiosis of Oral Microbiota During Oral Squamous  
786 Cell Carcinoma Development. *Front Oncol*. 2021;11:614448. doi:10.3389/fonc.2021.614448
- 787 44. Zhou X, Hao Y, Peng X, et al. The Clinical Potential of Oral Microbiota as a  
788 Screening Tool for Oral Squamous Cell Carcinomas. *Front Cell Infect Microbiol*.  
789 2021;11:728933. doi:10.3389/fcimb.2021.728933
- 790 45. Chen Z, Wong PY, Ng CWK, et al. The Intersection between Oral Microbiota, Host  
791 Gene Methylation and Patient Outcomes in Head and Neck Squamous Cell Carcinoma.  
792 *Cancers (Basel)*. Nov 18 2020;12(11)doi:10.3390/cancers12113425
- 793 46. Perera M, Al-Hebshi NN, Perera I, et al. Inflammatory Bacteriome and Oral  
794 Squamous Cell Carcinoma. *J Dent Res*. Jun 2018;97(6):725-732.  
795 doi:10.1177/0022034518767118
- 796 47. Al-Hebshi NN, Nasher AT, Maryoud MY, et al. Inflammatory bacteriome featuring  
797 *Fusobacterium nucleatum* and *Pseudomonas aeruginosa* identified in association with oral  
798 squamous cell carcinoma. *Sci Rep*. May 12 2017;7(1):1834. doi:10.1038/s41598-017-02079-  
799 3
- 800 48. Schmidt BL, Kuczynski J, Bhattacharya A, et al. Changes in abundance of oral  
801 microbiota associated with oral cancer. *PLoS One*. 2014;9(6):e98741.  
802 doi:10.1371/journal.pone.0098741
- 803 49. Wang H, Funchain P, Bebek G, et al. Microbiomic differences in tumor and paired-  
804 normal tissue in head and neck squamous cell carcinomas. *Genome Med*. Feb 7 2017;9(1):14.  
805 doi:10.1186/s13073-017-0405-5

- 806 50. Guerrero-Preston R, Godoy-Vitorino F, Jedlicka A, et al. 16S rRNA amplicon  
807 sequencing identifies microbiota associated with oral cancer, human papilloma virus  
808 infection and surgical treatment. *Oncotarget*. Aug 9 2016;7(32):51320-51334.  
809 doi:10.18632/oncotarget.9710
- 810 51. Gong H, Shi Y, Zhou X, et al. Microbiota in the Throat and Risk Factors for  
811 Laryngeal Carcinoma. *Appl Environ Microbiol*. Dec 2014;80(23):7356-63.  
812 doi:10.1128/aem.02329-14
- 813 52. Gong HL, Shi Y, Zhou L, et al. The Composition of Microbiome in Larynx and the  
814 Throat Biodiversity between Laryngeal Squamous Cell Carcinoma Patients and Control  
815 Population. *PLoS One*. 2013;8(6):e66476. doi:10.1371/journal.pone.0066476
- 816 53. Pushalkar S, Ji X, Li Y, et al. Comparison of oral microbiota in tumor and non-tumor  
817 tissues of patients with oral squamous cell carcinoma. *BMC Microbiol*. Jul 20 2012;12:144.  
818 doi:10.1186/1471-2180-12-144
- 819 54. Burcher KM, Burcher JT, Inscore L, Bloomer CH, Furdui CM, Porosnicu M. A  
820 Review of the Role of Oral Microbiome in the Development, Detection, and Management of  
821 Head and Neck Squamous Cell Cancers. *Cancers (Basel)*. Aug 25  
822 2022;14(17)doi:10.3390/cancers14174116
- 823 55. Yang K, Wang Y, Zhang S, et al. Oral Microbiota Analysis of Tissue Pairs and Saliva  
824 Samples From Patients With Oral Squamous Cell Carcinoma - A Pilot Study. *Front*  
825 *Microbiol*. 2021;12:719601. doi:10.3389/fmicb.2021.719601
- 826 56. Gopinath D, Kunnath Menon R, Chun Wie C, et al. Salivary bacterial shifts in oral  
827 leukoplakia resemble the dysbiotic oral cancer bacteriome. *J Oral Microbiol*. Dec 9  
828 2020;13(1):1857998. doi:10.1080/20002297.2020.1857998
- 829 57. Gong H, Shi Y, Xiao X, et al. Alterations of microbiota structure in the larynx  
830 relevant to laryngeal carcinoma. *Sci Rep*. Jul 14 2017;7(1):5507. doi:10.1038/s41598-017-  
831 05576-7
- 832 58. Dong Z, Zhang C, Zhao Q, et al. Alterations of bacterial communities of vocal cord  
833 mucous membrane increases the risk for glottic laryngeal squamous cell carcinoma. *J*  
834 *Cancer*. 2021;12(13):4049-4063. doi:10.7150/jca.54221
- 835 59. Shin JM, Luo T, Kamarajan P, Fenno JC, Rickard AH, Kapila YL. Microbial  
836 Communities Associated with Primary and Metastatic Head and Neck Squamous Cell  
837 Carcinoma - A High Fusobacterial and Low Streptococcal Signature. *Sci Rep*. Aug 30  
838 2017;7(1):9934. doi:10.1038/s41598-017-09786-x
- 839 60. Chan JYK, Cheung MK, Lan L, et al. Characterization of oral microbiota in HPV and  
840 non-HPV head and neck squamous cell carcinoma and its association with patient outcomes.  
841 *Oral Oncol*. Dec 2022;135:106245. doi:10.1016/j.oraloncology.2022.106245
- 842 61. Choi YS, Kim Y, Yoon HJ, et al. The presence of bacteria within tissue provides  
843 insights into the pathogenesis of oral lichen planus. *Sci Rep*. Jul 7 2016;6:29186.  
844 doi:10.1038/srep29186
- 845 62. Baek K, Lee J, Lee A, et al. Characterization of intratissue bacterial communities and  
846 isolation of *Escherichia coli* from oral lichen planus lesions. *Sci Rep*. Feb 26  
847 2020;10(1):3495. doi:10.1038/s41598-020-60449-w
- 848 63. Bao K, Li X, Poveda L, et al. Proteome and Microbiome Mapping of Human Gingival  
849 Tissue in Health and Disease. *Front Cell Infect Microbiol*. 2020;10:588155.  
850 doi:10.3389/fcimb.2020.588155
- 851 64. Sawant S, Dugad J, Parikh D, Srinivasan S, Singh H. Identification & correlation of  
852 bacterial diversity in oral cancer and long-term tobacco chewers- A case-control pilot study. *J*  
853 *Med Microbiol*. Sep 2021;70(9)doi:10.1099/jmm.0.001417

- 854 65. Frank DN, Qiu Y, Cao Y, et al. A dysbiotic microbiome promotes head and neck  
855 squamous cell carcinoma. *Oncogene*. Feb 2022;41(9):1269-1280. doi:10.1038/s41388-021-  
856 02137-1
- 857 66. Sharma AK, DeBusk WT, Stepanov I, Gomez A, Khariwala SS. Oral Microbiome  
858 Profiling in Smokers with and without Head and Neck Cancer Reveals Variations Between  
859 Health and Disease. *Cancer Prev Res (Phila)*. May 2020;13(5):463-474. doi:10.1158/1940-  
860 6207.Capr-19-0459
- 861 67. Lau HC, Hsueh CY, Gong H, et al. Oropharynx microbiota transitions in  
862 hypopharyngeal carcinoma treatment of induced chemotherapy followed by surgery. *BMC*  
863 *Microbiol*. Nov 9 2021;21(1):310. doi:10.1186/s12866-021-02362-4
- 864 68. Hsueh CY, Gong H, Cong N, et al. Throat Microbial Community Structure and  
865 Functional Changes in Postsurgery Laryngeal Carcinoma Patients. *Appl Environ Microbiol*.  
866 Nov 24 2020;86(24)doi:10.1128/aem.01849-20
- 867 69. Panda M, Rai AK, Rahman T, et al. Alterations of salivary microbial community  
868 associated with oropharyngeal and hypopharyngeal squamous cell carcinoma patients. *Arch*  
869 *Microbiol*. May 2020;202(4):785-805. doi:10.1007/s00203-019-01790-1
- 870 70. Vesty A, Gear K, Biswas K, Radcliff FJ, Taylor MW, Douglas RG. Microbial and  
871 inflammatory-based salivary biomarkers of head and neck squamous cell carcinoma. *Clin*  
872 *Exp Dent Res*. Dec 2018;4(6):255-262. doi:10.1002/cre2.139
- 873 71. Lee WH, Chen HM, Yang SF, et al. Bacterial alterations in salivary microbiota and  
874 their association in oral cancer. *Sci Rep*. Nov 28 2017;7(1):16540. doi:10.1038/s41598-017-  
875 16418-x
- 876 72. Amer A, Galvin S, Healy CM, Moran GP. The Microbiome of Potentially Malignant  
877 Oral Leukoplakia Exhibits Enrichment for Fusobacterium, Leptotrichia, Campylobacter, and  
878 Rothia Species. *Front Microbiol*. 2017;8:2391. doi:10.3389/fmicb.2017.02391
- 879 73. Chen MY, Chen JW, Wu LW, et al. Carcinogenesis of Male Oral Submucous Fibrosis  
880 Alters Salivary Microbiomes. *J Dent Res*. Apr 2021;100(4):397-405.  
881 doi:10.1177/0022034520968750
- 882 74. Debelius JW, Huang T, Cai Y, et al. Subspecies Niche Specialization in the Oral  
883 Microbiome Is Associated with Nasopharyngeal Carcinoma Risk. *mSystems*. Jul 7  
884 2020;5(4)doi:10.1128/mSystems.00065-20
- 885 75. Kumpitsch C, Moissl-Eichinger C, Pock J, Thurnher D, Wolf A. Preliminary insights  
886 into the impact of primary radiochemotherapy on the salivary microbiome in head and neck  
887 squamous cell carcinoma. *Sci Rep*. Oct 6 2020;10(1):16582. doi:10.1038/s41598-020-73515-  
888 0
- 889 76. Wolf A, Moissl-Eichinger C, Perras A, Koskinen K, Tomazic PV, Thurnher D. The  
890 salivary microbiome as an indicator of carcinogenesis in patients with oropharyngeal  
891 squamous cell carcinoma: A pilot study. *Sci Rep*. Jul 19 2017;7(1):5867. doi:10.1038/s41598-  
892 017-06361-2
- 893 77. Zhu XX, Yang XJ, Chao YL, et al. The Potential Effect of Oral Microbiota in the  
894 Prediction of Mucositis During Radiotherapy for Nasopharyngeal Carcinoma. *EBioMedicine*.  
895 Apr 2017;18:23-31. doi:10.1016/j.ebiom.2017.02.002
- 896 78. Furquim CP, Soares GM, Ribeiro LL, et al. The Salivary Microbiome and Oral  
897 Cancer Risk: a Pilot Study in Fanconi Anemia. *J Dent Res*. Mar 2017;96(3):292-299.  
898 doi:10.1177/0022034516678169
- 899 79. Zhang J, Liu H, Liang X, et al. Investigation of salivary function and oral microbiota  
900 of radiation caries-free people with nasopharyngeal carcinoma. *PLoS One*.  
901 2015;10(4):e0123137. doi:10.1371/journal.pone.0123137

- 902 80. Hu YJ, Wang Q, Jiang YT, et al. Characterization of oral bacterial diversity of  
903 irradiated patients by high-throughput sequencing. *Int J Oral Sci*. Mar 2013;5(1):21-5.  
904 doi:10.1038/ijos.2013.15
- 905 81. Pushalkar S, Mane SP, Ji X, et al. Microbial diversity in saliva of oral squamous cell  
906 carcinoma. *FEMS Immunol Med Microbiol*. Apr 2011;61(3):269-77. doi:10.1111/j.1574-  
907 695X.2010.00773.x
- 908 82. Hu YJ, Shao ZY, Wang Q, et al. Exploring the dynamic core microbiome of plaque  
909 microbiota during head-and-neck radiotherapy using pyrosequencing. *PLoS One*.  
910 2013;8(2):e56343. doi:10.1371/journal.pone.0056343
- 911 83. Minarovits J. Anaerobic bacterial communities associated with oral carcinoma:  
912 Intratumoral, surface-biofilm and salivary microbiota. *Anaerobe*. Apr 2021;68:102300.  
913 doi:10.1016/j.anaerobe.2020.102300
- 914 84. Orlandi E, Iacovelli NA, Tombolini V, et al. Potential role of microbiome in  
915 oncogenesis, outcome prediction and therapeutic targeting for head and neck cancer. *Oral*  
916 *Oncol*. Dec 2019;99:104453. doi:10.1016/j.oraloncology.2019.104453
- 917 85. Gopinath D, Menon RK, Wie CC, et al. Differences in the bacteriome of swab, saliva,  
918 and tissue biopsies in oral cancer. *Sci Rep*. Jan 13 2021;11(1):1181. doi:10.1038/s41598-020-  
919 80859-0
- 920 86. Jain V, Baraniya D, El-Hadedy DE, et al. Integrative Metatranscriptomic Analysis  
921 Reveals Disease-specific Microbiome–host Interactions in Oral Squamous Cell Carcinoma.  
922 *Cancer Res Commun*. 2023;3(5):807-820. doi:10.1158/2767-9764.CRC-22-0349
- 923 87. Wang X, Zhao Z, Tang N, et al. Microbial Community Analysis of Saliva and  
924 Biopsies in Patients With Oral Lichen Planus. *Front Microbiol*. 2020;11:629.  
925 doi:10.3389/fmicb.2020.00629
- 926 88. Zhang Z, Feng Q, Li M, et al. Age-Related Cancer-Associated Microbiota Potentially  
927 Promotes Oral Squamous Cell Cancer Tumorigenesis by Distinct Mechanisms. *Front*  
928 *Microbiol*. 2022;13:852566. doi:10.3389/fmicb.2022.852566
- 929 89. Nie F, Wang L, Huang Y, et al. Characteristics of Microbial Distribution in Different  
930 Oral Niches of Oral Squamous Cell Carcinoma. *Front Cell Infect Microbiol*.  
931 2022;12:905653. doi:10.3389/fcimb.2022.905653
- 932 90. Qiao H, Li H, Wen X, Tan X, Yang C, Liu N. Multi-Omics Integration Reveals the  
933 Crucial Role of Fusobacterium in the Inflammatory Immune Microenvironment in Head and  
934 Neck Squamous Cell Carcinoma. *Microbiol Spectr*. Aug 31 2022;10(4):e0106822.  
935 doi:10.1128/spectrum.01068-22
- 936 91. Wang Y, KA LC. PLSDA-batch: a multivariate framework to correct for batch effects  
937 in microbiome data. *Brief Bioinform*. Mar 19 2023;24(2)doi:10.1093/bib/bbac622
- 938 92. Page MJ, McKenzie JE, Bossuyt PM, et al. The PRISMA 2020 statement: an updated  
939 guideline for reporting systematic reviews. *Rev Esp Cardiol (Engl Ed)*. Sep 2021;74(9):790-  
940 799. Declaración PRISMA 2020: una guía actualizada para la publicación de revisiones  
941 sistemáticas. doi:10.1016/j.rec.2021.07.010
- 942 93. Choudhary S. pysradb: A Python package to query next-generation sequencing  
943 metadata and data from NCBI Sequence Read Archive. *F1000Res*. 2019;8:532.  
944 doi:10.12688/f1000research.18676.1
- 945 94. Leinonen R, Sugawara H, Shumway M. The sequence read archive. *Nucleic Acids*  
946 *Res*. Jan 2011;39(Database issue):D19-21. doi:10.1093/nar/gkq1019
- 947 95. Bolyen E, Rideout JR, Dillon MR, et al. Reproducible, interactive, scalable and  
948 extensible microbiome data science using QIIME 2. *Nat Biotechnol*. Aug 2019;37(8):852-  
949 857. doi:10.1038/s41587-019-0209-9



- 950 96. Rohart F, Gautier B, Singh A, KA LC. mixOmics: An R package for 'omics feature  
951 selection and multiple data integration. *PLoS Comput Biol*. Nov 2017;13(11):e1005752.  
952 doi:10.1371/journal.pcbi.1005752
- 953 97. McMurdie PJ, Holmes S. phyloseq: an R package for reproducible interactive analysis  
954 and graphics of microbiome census data. *PLoS One*. 2013;8(4):e61217.  
955 doi:10.1371/journal.pone.0061217
- 956 98. Moentadj R, Wang Y, Bowerman K, et al. Streptococcus species enriched in the oral  
957 cavity of patients with RA are a source of peptidoglycan-polysaccharide polymers that can  
958 induce arthritis in mice. *Ann Rheum Dis*. May 2021;80(5):573-581.  
959 doi:10.1136/annrheumdis-2020-219009
- 960 99. Gloor GB, Macklaim JM, Pawlowsky-Glahn V, Egozcue JJ. Microbiome Datasets  
961 Are Compositional: And This Is Not Optional. *Front Microbiol*. 2017;8:2224.  
962 doi:10.3389/fmicb.2017.02224
- 963 100. Khomich M, Måge I, Rud I, Berget I. Analysing microbiome intervention design  
964 studies: Comparison of alternative multivariate statistical methods. *PLoS One*.  
965 2021;16(11):e0259973. doi:10.1371/journal.pone.0259973
- 966 101. Cao Y, Dong Q, Wang D, Zhang P, Liu Y, Niu C. microbiomeMarker: an  
967 R/Bioconductor package for microbiome marker identification and visualization.  
968 *Bioinformatics*. Aug 10 2022;38(16):4027-4029. doi:10.1093/bioinformatics/btac438
- 969 102. Douglas GM, Maffei VJ, Zaneveld JR, et al. PICRUSt2 for prediction of metagenome  
970 functions. *Nat Biotechnol*. Jun 2020;38(6):685-688. doi:10.1038/s41587-020-0548-6
- 971 103. Caspi R, Billington R, Keseler IM, et al. The MetaCyc database of metabolic  
972 pathways and enzymes - a 2019 update. *Nucleic Acids Res*. Jan 8 2020;48(D1):D445-d453.  
973 doi:10.1093/nar/gkz862
- 974 104. Gao J, Aksoy BA, Dogrusoz U, et al. Integrative analysis of complex cancer  
975 genomics and clinical profiles using the cBioPortal. *Sci Signal*. Apr 2 2013;6(269):p11.  
976 doi:10.1126/scisignal.2004088
- 977 105. Bagaev A, Kotlov N, Nomie K, et al. Conserved pan-cancer microenvironment  
978 subtypes predict response to immunotherapy. *Cancer Cell*. Jun 14 2021;39(6):845-865.e7.  
979 doi:10.1016/j.ccell.2021.04.014
- 980 106. Eren AM, Borisy GG, Huse SM, Mark Welch JL. Oligotyping analysis of the human  
981 oral microbiome. *Proc Natl Acad Sci U S A*. Jul 15 2014;111(28):E2875-84.  
982 doi:10.1073/pnas.1409644111
- 983 107. Mark Welch JL, Rossetti BJ, Rieken CW, Dewhirst FE, Borisy GG. Biogeography of  
984 a human oral microbiome at the micron scale. *Proc Natl Acad Sci U S A*. Feb 9  
985 2016;113(6):E791-800. doi:10.1073/pnas.1522149113
- 986 108. Wilbert SA, Mark Welch JL, Borisy GG. Spatial Ecology of the Human Tongue  
987 Dorsum Microbiome. *Cell Rep*. Mar 24 2020;30(12):4003-4015.e3.  
988 doi:10.1016/j.celrep.2020.02.097
- 989 109. Shao W, Fujiwara N, Mouri Y, et al. Conversion from epithelial to partial-EMT  
990 phenotype by *Fusobacterium nucleatum* infection promotes invasion of oral cancer cells. *Sci*  
991 *Rep*. Jul 22 2021;11(1):14943. doi:10.1038/s41598-021-94384-1
- 992 110. Chen G, Gao C, Jiang S, et al. *Fusobacterium nucleatum* outer membrane vesicles  
993 activate autophagy to promote oral cancer metastasis. *J Adv Res*. Apr 13  
994 2023;doi:10.1016/j.jare.2023.04.002
- 995 111. Geng F, Zhang Y, Lu Z, Zhang S, Pan Y. *Fusobacterium nucleatum* Caused DNA  
996 Damage and Promoted Cell Proliferation by the Ku70/p53 Pathway in Oral Cancer Cells.  
997 *DNA Cell Biol*. Jan 2020;39(1):144-151. doi:10.1089/dna.2019.5064
- 998 112. Zhang S, Li C, Liu J, et al. *Fusobacterium nucleatum* promotes epithelial-  
999 mesenchymal transition through regulation of the lncRNA MIR4435-2HG/miR-296-

- 1000 5p/Akt2/SNAI1 signaling pathway. *Febs j.* Sep 2020;287(18):4032-4047.  
1001 doi:10.1111/febs.15233
- 1002 113. Binder Gallimidi A, Fischman S, Revach B, et al. Periodontal pathogens  
1003 *Porphyromonas gingivalis* and *Fusobacterium nucleatum* promote tumor progression in an  
1004 oral-specific chemical carcinogenesis model. *Oncotarget.* Sep 8 2015;6(26):22613-23.  
1005 doi:10.18632/oncotarget.4209
- 1006 114. Baty JJ, Stoner SN, Scofield JA. Oral Commensal Streptococci: Gatekeepers of the  
1007 Oral Cavity. *J Bacteriol.* Nov 15 2022;204(11):e0025722. doi:10.1128/jb.00257-22
- 1008 115. Tsai MS, Chen YY, Chen WC, Chen MF. Streptococcus mutans promotes tumor  
1009 progression in oral squamous cell carcinoma. *J Cancer.* 2022;13(12):3358-3367.  
1010 doi:10.7150/jca.73310
- 1011 116. Baraniya D, Jain V, Lucarelli R, et al. Screening of Health-Associated Oral Bacteria  
1012 for Anticancer Properties in vitro. *Front Cell Infect Microbiol.* 2020;10:575656.  
1013 doi:10.3389/fcimb.2020.575656
- 1014 117. Xu Y, Jia Y, Chen L, Gao J, Yang D. Effect of Streptococcus anginosus on biological  
1015 response of tongue squamous cell carcinoma cells. *BMC Oral Health.* Mar 20  
1016 2021;21(1):141. doi:10.1186/s12903-021-01505-3
- 1017 118. Baraniya D, Chitralla KN, Al-Hebshi NN. Global transcriptional response of oral  
1018 squamous cell carcinoma cell lines to health-associated oral bacteria - an in vitro study. *J*  
1019 *Oral Microbiol.* 2022;14(1):2073866. doi:10.1080/20002297.2022.2073866
- 1020 119. Wang J, Sun F, Lin X, Li Z, Mao X, Jiang C. Cytotoxic T cell responses to  
1021 Streptococcus are associated with improved prognosis of oral squamous cell carcinoma. *Exp*  
1022 *Cell Res.* Jan 1 2018;362(1):203-208. doi:10.1016/j.yexcr.2017.11.018
- 1023 120. Wang J, Yang L, Mao X, Li Z, Lin X, Jiang C. Streptococcus salivarius-mediated  
1024 CD8(+) T cell stimulation required antigen presentation by macrophages in oral squamous  
1025 cell carcinoma. *Exp Cell Res.* May 15 2018;366(2):121-126. doi:10.1016/j.yexcr.2018.03.007
- 1026 121. Curry KD, Wang Q, Nute MG, et al. Emu: species-level microbial community  
1027 profiling of full-length 16S rRNA Oxford Nanopore sequencing data. *Nat Methods.* Jul  
1028 2022;19(7):845-853. doi:10.1038/s41592-022-01520-4
- 1029 122. Johnson JS, Spakowicz DJ, Hong BY, et al. Evaluation of 16S rRNA gene sequencing  
1030 for species and strain-level microbiome analysis. *Nat Commun.* Nov 6 2019;10(1):5029.  
1031 doi:10.1038/s41467-019-13036-1
- 1032 123. Gehrig JL, Portik DM, Driscoll MD, et al. Finding the right fit: evaluation of short-  
1033 read and long-read sequencing approaches to maximize the utility of clinical microbiome  
1034 data. *Microb Genom.* Mar 2022;8(3)doi:10.1099/mgen.0.000794
- 1035 124. Garcia-Bermudez J, Baudrier L, La K, et al. Aspartate is a limiting metabolite for  
1036 cancer cell proliferation under hypoxia and in tumours. *Nat Cell Biol.* Jul 2018;20(7):775-  
1037 781. doi:10.1038/s41556-018-0118-z
- 1038 125. Krall AS, Xu S, Graeber TG, Braas D, Christofk HR. Asparagine promotes cancer  
1039 cell proliferation through use as an amino acid exchange factor. *Nat Commun.* Apr 29  
1040 2016;7:11457. doi:10.1038/ncomms11457
- 1041 126. Halbrook CJ, Thurston G, Boyer S, et al. Differential integrated stress response and  
1042 asparagine production drive symbiosis and therapy resistance of pancreatic adenocarcinoma  
1043 cells. *Nat Cancer.* Nov 2022;3(11):1386-1403. doi:10.1038/s43018-022-00463-1
- 1044 127. Donohoe DR, Garge N, Zhang X, et al. The microbiome and butyrate regulate energy  
1045 metabolism and autophagy in the mammalian colon. *Cell Metab.* May 4 2011;13(5):517-26.  
1046 doi:10.1016/j.cmet.2011.02.018
- 1047 128. Mashimo T, Pichumani K, Vemireddy V, et al. Acetate is a bioenergetic substrate for  
1048 human glioblastoma and brain metastases. *Cell.* Dec 18 2014;159(7):1603-14.  
1049 doi:10.1016/j.cell.2014.11.025

- 1050 129. Lyssiotis CA, Cantley LC. Acetate fuels the cancer engine. *Cell*. Dec 18  
1051 2014;159(7):1492-4. doi:10.1016/j.cell.2014.12.009
- 1052 130. Comerford SA, Huang Z, Du X, et al. Acetate dependence of tumors. *Cell*. Dec 18  
1053 2014;159(7):1591-602. doi:10.1016/j.cell.2014.11.020
- 1054 131. Donohoe DR, Collins LB, Wali A, Bigler R, Sun W, Bultman SJ. The Warburg effect  
1055 dictates the mechanism of butyrate-mediated histone acetylation and cell proliferation. *Mol*  
1056 *Cell*. Nov 30 2012;48(4):612-26. doi:10.1016/j.molcel.2012.08.033
- 1057 132. Koh A, De Vadder F, Kovatcheva-Datchary P, Bäckhed F. From Dietary Fiber to  
1058 Host Physiology: Short-Chain Fatty Acids as Key Bacterial Metabolites. *Cell*. Jun 2  
1059 2016;165(6):1332-1345. doi:10.1016/j.cell.2016.05.041
- 1060 133. van der Hee B, Wells JM. Microbial Regulation of Host Physiology by Short-chain  
1061 Fatty Acids. *Trends Microbiol*. Aug 2021;29(8):700-712. doi:10.1016/j.tim.2021.02.001
- 1062 134. Li Z, Wang Q, Huang X, et al. Lactate in the tumor microenvironment: A rising star  
1063 for targeted tumor therapy. *Front Nutr*. 2023;10:1113739. doi:10.3389/fnut.2023.1113739
- 1064 135. Mima K, Sukawa Y, Nishihara R, et al. Fusobacterium nucleatum and T Cells in  
1065 Colorectal Carcinoma. *JAMA Oncol*. Aug 2015;1(5):653-61.  
1066 doi:10.1001/jamaoncol.2015.1377
- 1067 136. Kim HS, Kim CG, Kim WK, et al. Fusobacterium nucleatum induces a tumor  
1068 microenvironment with diminished adaptive immunity against colorectal cancers. *Front Cell*  
1069 *Infect Microbiol*. 2023;13:1101291. doi:10.3389/fcimb.2023.1101291
- 1070 137. Kosumi K, Baba Y, Yamamura K, et al. Intratumour Fusobacterium nucleatum and  
1071 immune response to oesophageal cancer. *Br J Cancer*. Apr 2023;128(6):1155-1165.  
1072 doi:10.1038/s41416-022-02112-x
- 1073 138. Dahlstrand Rudin A, Khamzeh A, Venkatakrishnan V, Basic A, Christenson K,  
1074 Bylund J. Short chain fatty acids released by Fusobacterium nucleatum are neutrophil  
1075 chemoattractants acting via free fatty acid receptor 2 (FFAR2). *Cell Microbiol*. Aug  
1076 2021;23(8):e13348. doi:10.1111/cmi.13348
- 1077 139. Mendes RT, Nguyen D, Stephens D, et al. Endothelial Cell Response to  
1078 Fusobacterium nucleatum. *Infect Immun*. Jul 2016;84(7):2141-2148. doi:10.1128/iai.01305-  
1079 15
- 1080 140. Wang Q, Zhao L, Xu C, Zhou J, Wu Y. Fusobacterium nucleatum stimulates  
1081 monocyte adhesion to and transmigration through endothelial cells. *Arch Oral Biol*. Apr  
1082 2019;100:86-92. doi:10.1016/j.archoralbio.2019.02.013
- 1083 141. Wright HJ, Chapple IL, Matthews JB, Cooper PR. Fusobacterium nucleatum  
1084 regulation of neutrophil transcription. *J Periodontal Res*. Feb 2011;46(1):1-12.  
1085 doi:10.1111/j.1600-0765.2010.01299.x
- 1086 142. Zhou T, Meng X, Wang D, Fu W, Li X. Neutrophil Transcriptional Deregulation by  
1087 the Periodontal Pathogen Fusobacterium nucleatum in Gastric Cancer: A Bioinformatic  
1088 Study. *Dis Markers*. 2022;2022:9584507. doi:10.1155/2022/9584507
- 1089 143. Neuzillet C, Marchais M, Vacher S, et al. Prognostic value of intratumoral  
1090 Fusobacterium nucleatum and association with immune-related gene expression in oral  
1091 squamous cell carcinoma patients. *Sci Rep*. Apr 12 2021;11(1):7870. doi:10.1038/s41598-  
1092 021-86816-9
- 1093 144. Mima K, Nishihara R, Qian ZR, et al. Fusobacterium nucleatum in colorectal  
1094 carcinoma tissue and patient prognosis. *Gut*. Dec 2016;65(12):1973-1980.  
1095 doi:10.1136/gutjnl-2015-310101
- 1096 145. Lehr K, Nikitina D, Vilchez-Vargas R, et al. Microbial composition of tumorous and  
1097 adjacent gastric tissue is associated with prognosis of gastric cancer. *Sci Rep*. Mar 21  
1098 2023;13(1):4640. doi:10.1038/s41598-023-31740-3

- 1099 146. Hsieh YY, Kuo WL, Hsu WT, Tung SY, Li C. Fusobacterium Nucleatum-Induced  
1100 Tumor Mutation Burden Predicts Poor Survival of Gastric Cancer Patients. *Cancers (Basel)*.  
1101 Dec 30 2022;15(1)doi:10.3390/cancers15010269  
1102 147. Zhang N, Liu Y, Yang H, et al. Clinical Significance of Fusobacterium nucleatum  
1103 Infection and Regulatory T Cell Enrichment in Esophageal Squamous Cell Carcinoma.  
1104 *Pathol Oncol Res*. 2021;27:1609846. doi:10.3389/pore.2021.1609846  
1105 148. Jo AR, Baek KJ, Shin JE, Choi Y. Mechanisms of IL-8 suppression by Treponema  
1106 denticola in gingival epithelial cells. *Immunol Cell Biol*. Feb 2014;92(2):139-47.  
1107 doi:10.1038/icb.2013.80  
1108 149. Babolin C, Amedei A, Ozolins D, Zilevica A, D'Elis MM, de Bernard M. TpF1 from  
1109 Treponema pallidum activates inflammasome and promotes the development of regulatory T  
1110 cells. *J Immunol*. Aug 1 2011;187(3):1377-84. doi:10.4049/jimmunol.1100615  
1111 150. Hashimoto M, Asai Y, Ogawa T. Treponemal phospholipids inhibit innate immune  
1112 responses induced by pathogen-associated molecular patterns. *J Biol Chem*. Nov 7  
1113 2003;278(45):44205-13. doi:10.1074/jbc.M306735200  
1114 151. Kataoka H, Taniguchi M, Fukamachi H, Arimoto T, Morisaki H, Kuwata H. Rothia  
1115 dentocariosa induces TNF-alpha production in a TLR2-dependent manner. *Pathog Dis*. Jun  
1116 2014;71(1):65-8. doi:10.1111/2049-632x.12115  
1117 152. Hawkes CG, Hinson AN, Vashishta A, et al. Selenomonas sputigena Interactions with  
1118 Gingival Epithelial Cells That Promote Inflammation. *Infect Immun*. Feb 16  
1119 2023;91(2):e0031922. doi:10.1128/iai.00319-22  
1120 153. Xu Z, Lv Z, Chen F, et al. Dysbiosis of human tumor microbiome and aberrant  
1121 residence of Actinomyces in tumor-associated fibroblasts in young-onset colorectal cancer.  
1122 *Front Immunol*. 2022;13:1008975. doi:10.3389/fimmu.2022.1008975  
1123

1124 **Supplementary Figures**

1125

1126

1127

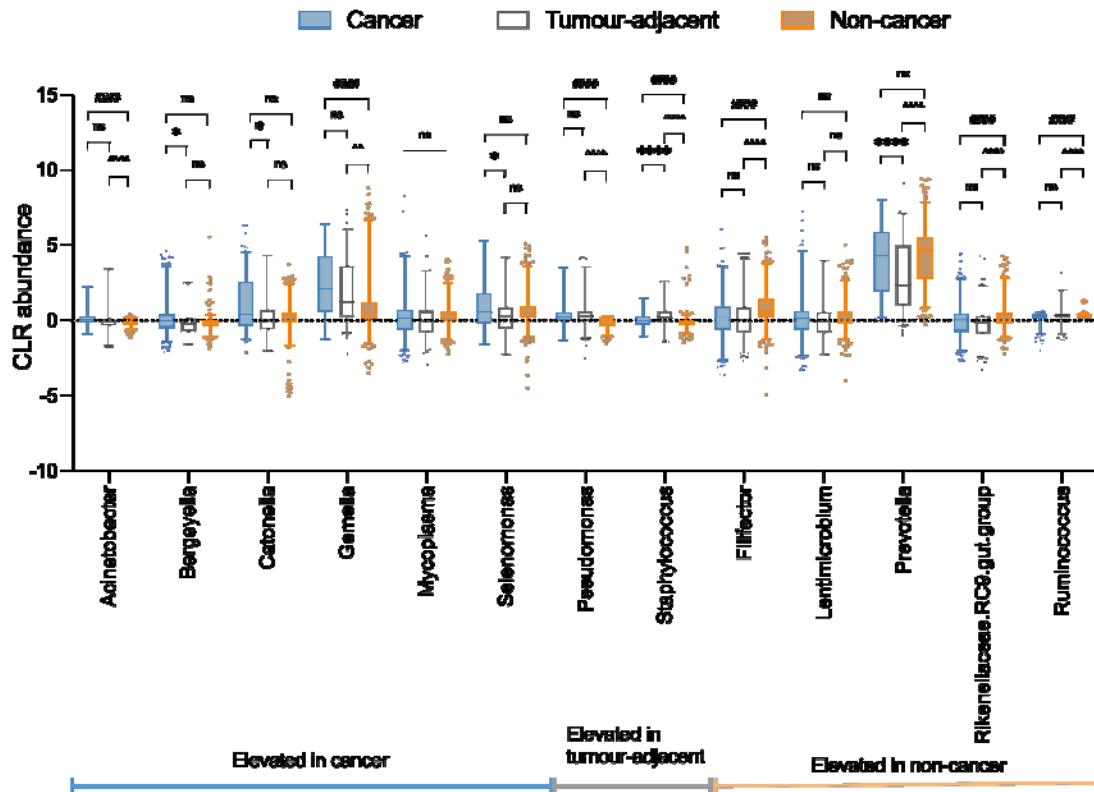

1128

1129 Figure S1: CLR-normalized abundances for remaining 13 bacteria between sample groups using unpaired

1130 Kruskal-Wallis test with Bonferroni's multiple comparison. Post-hoc Wilcoxon test with Bonferroni-Dunn's

1131 multiple comparison was performed to identify group-wise differences between Cancer – Non-cancer (#),

1132 Cancer – Cancer-adjacent (\*), Non-cancer – Cancer-adjacent (^).

1133

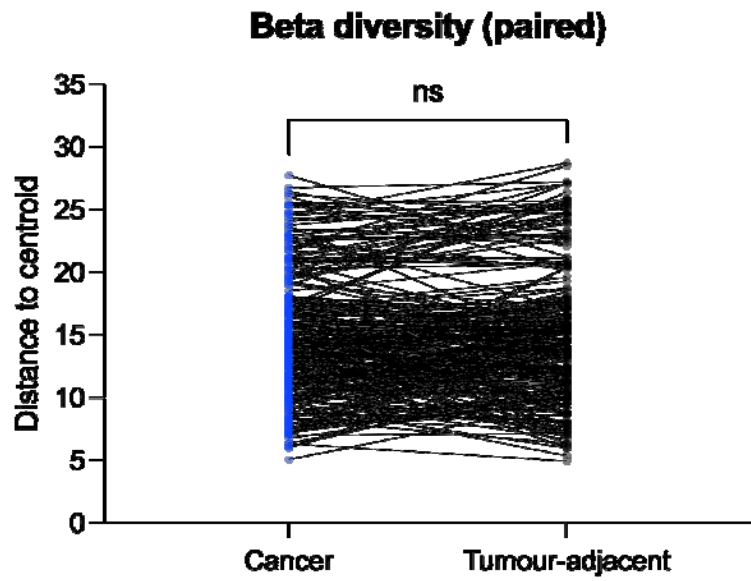

1134

1135 Figure S2: Beta-diversity between paired cancer and cancer-adjacent tissue samples. Paired Wilcoxon test was  
1136 performed on Euclidean distance between each samples. No significant differences between cancer and cancer-  
1137 adjacent tissue samples.

1138
